# Supplementary material
Source: PubMed Central journal article supplement (PMC7321997)
Supplement: pnas.1916673117.sapp.pdf [file pnas.1916673117.sapp.pdf]

Supplementary Information for

**Massive formation of early diagenetic dolomite in the Ediacaran ocean: Constraints on the “dolomite problem”**

Biao Chang, Chao Li, Deng Liu, Ian Foster, Aradhna Tripathi, Max K. Lloyd, Ingrid Maradiaga, Genming Luo, Zhihui An, Zhenbing She, Shucheng Xie, Jinnan Tong, Junhua Huang, Thomas J. Algeo, Timothy W. Lyons, Adrian Immenhauser

Chao Li

Email: chaoli@cug.edu.cn

Junhua Huang

Email: jhhuang@cug.edu.cn

**This PDF file includes:**

Figures S1 to S12

Tables S1 to S5

SI References

## Supplementary figures

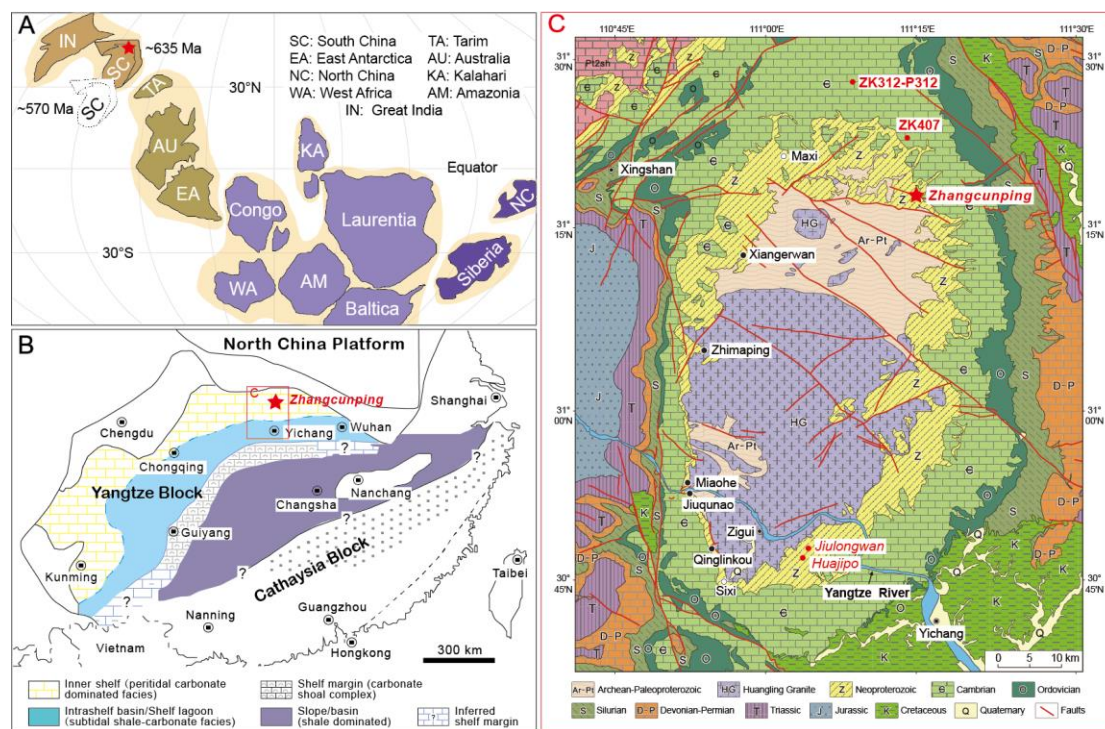

**Fig. S1.** Geological setting of the Ediacaran Doushantuo Formation in South China. (A) Location of South China (SC) in a global reconstruction at ca. 635 Ma and its latitudinal change from ca. 635 to ca. 570 Ma (dashed outline) (1). (B) Main facies of the Doushantuo Formation on the Yangtze Block. Location of Zhangcunping town shown as red star. (C) Geological map of the Yangtze Gorges area showing locations of drillcores ZK312-P312 and ZK407 as red dots close to Zhangcunping town. The Jiulongwan and Huajipo outcrop sections, which were previously studied for dolomite  $T_{\Delta 47}$  (2, 3), are also marked with red dots. Subfigures (A-C) are modified from refs. 4, 5, and 6. Copyright (2013, 2011, and 2015), respectively, with permission from Elsevier.

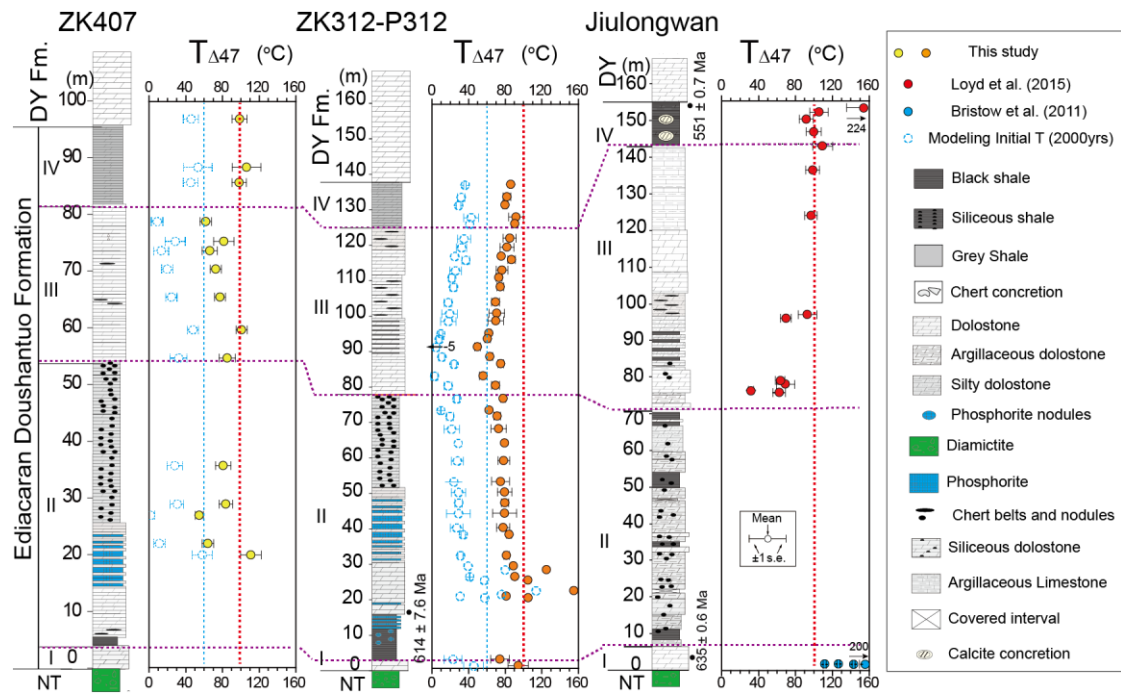

**Fig. S2.** Dolomite clumped isotope temperature ( $T_{\Delta 47}$ ) profiles of the Ediacaran Doushantuo Formation in the ZK312-P312 and ZK407 drillcores, compared to a previously reported profile for the Jiulongwan section (2, 3). The initial  $T_{\Delta 47}$  data (i.e., blue circles) are based on a solid-state reordering model assuming a peak heating temperature ( $T$ ) of 270 °C for 2000 years. See main text for details regarding stratigraphic correlations and the solid-state reordering model. I-IV = Members I to IV of the Doushantuo Formation, NT = Nantuo, DY = Dengying, Fm. = Formation.

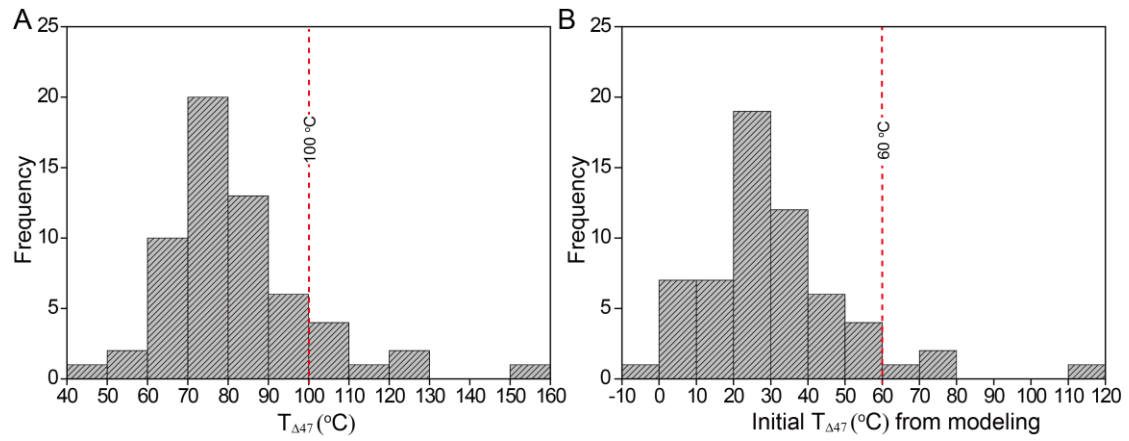

**Fig. S3.** Histograms of measured  $T_{\Delta 47}$  values of Doushantuo dolomite (A) and of their initial  $T_{\Delta 47}$  values from modeling (B). The initial  $T_{\Delta 47}$  values from modeling are based on a solid-state reordering model assuming a hydrothermal event with a peak heating of 270°C for 2000 years. See text for modeling details.



A Core sample and corresponding photomicrograph

Lithologic description

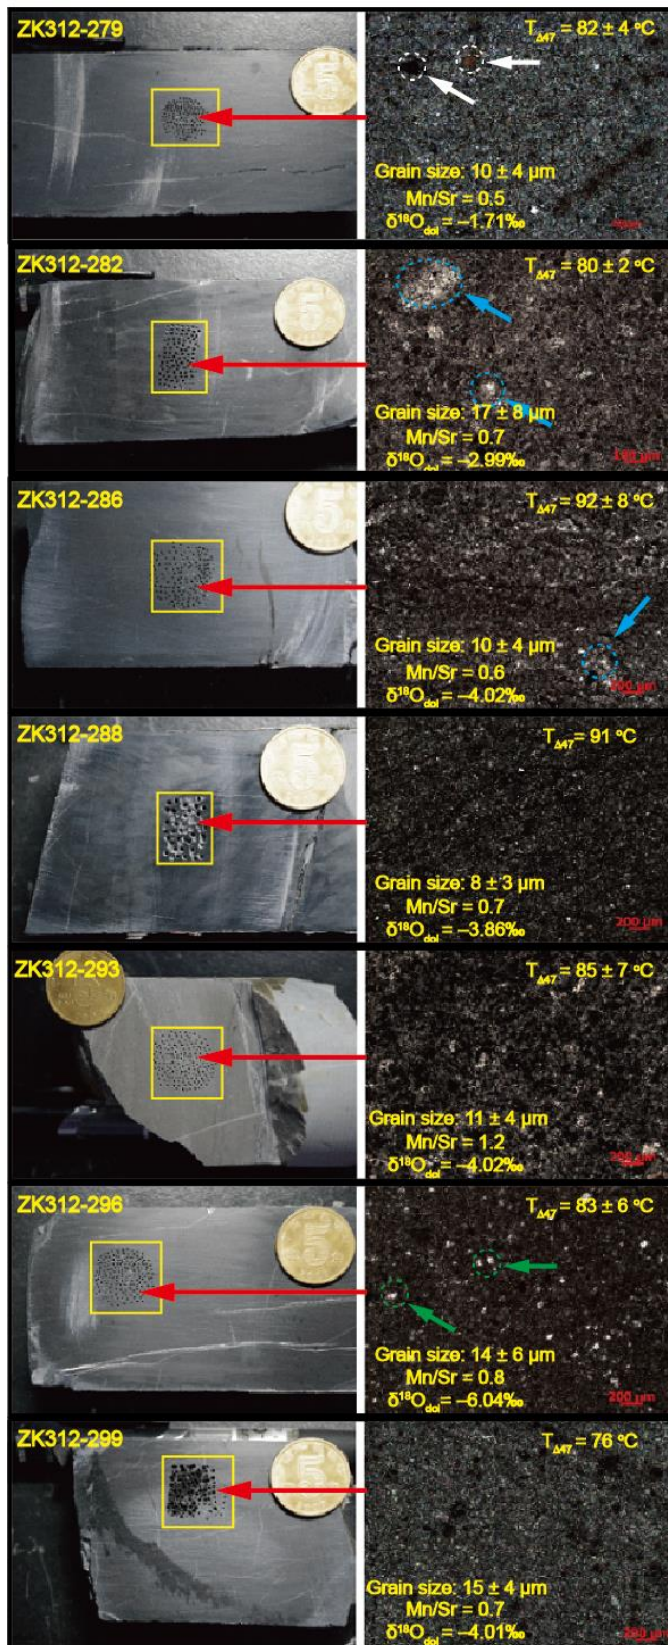

**ZK312-279:**  
 Microcrystalline dolomite and dolosparite containing phosphatic grains (white arrows)

**ZK312-282:**  
 Microcrystalline dolomite containing dolosparite particles (blue arrows) and dispersed phosphatic grains

**ZK312-286:**  
 Microcrystalline dolomite containing dolosparite particles (blue arrows) and dispersed phosphatic grains

**ZK312-288:**  
 Microcrystalline dolomite and dolosparite containing phosphatic grains

**ZK312-293:**  
 Microcrystalline dolomite containing dolosparite patches and dispersed phosphatic patches

**ZK312-296:**  
 Microcrystalline dolomite containing dolosparite and calcisparite patches (green arrows) and dispersed phosphatic grains

**ZK312-299:**  
 Microcrystalline dolomite containing dolosparite particles and phosphatic grains



## B Core sample and corresponding photomicrograph

## Lithologic description

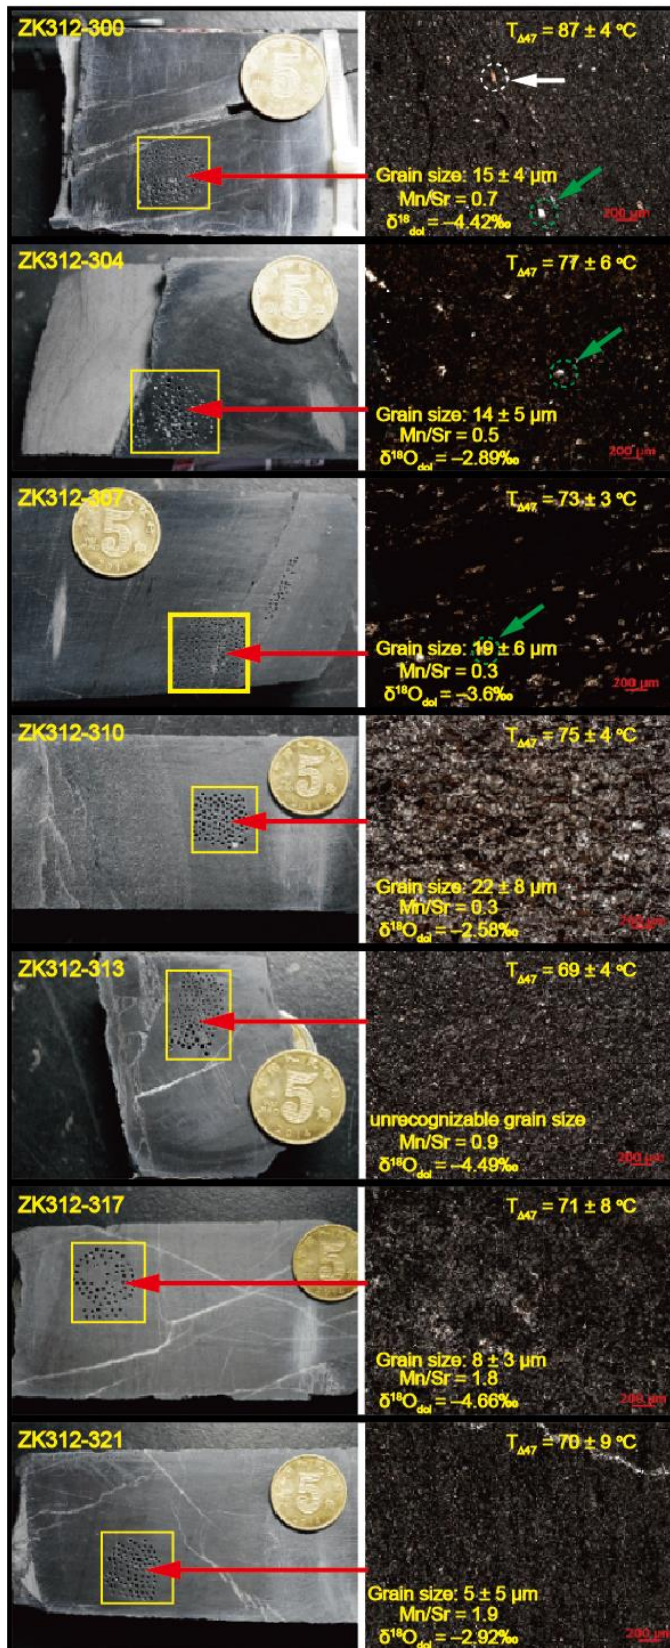

**ZK312-300:**  
Microcrystalline dolomite and dolosparite containing calcisparite patches (green arrows) and phosphatic grains (white arrows)

**ZK312-304:**  
Microcrystalline dolomite and dolosparite containing calcisparite patches (green arrows)

**ZK312-307:**  
Microcrystalline dolomite and dolosparite containing calcisparite patches (green arrows)

**ZK312-310:**  
Microcrystalline dolomite containing dolosparite particles and dispersed phosphatic grains

**ZK312-313:**  
Microcrystalline dolomite containing dolosparite particles and dispersed phosphatic grains

**ZK312-317:**  
Microcrystalline dolomite containing dolosparite particles and dispersed phosphatic grains

**ZK312-321:**  
Microcrystalline dolomite and dolosparite containing phosphatic grains



## C Core sample and corresponding photomicrograph

## Lithologic description

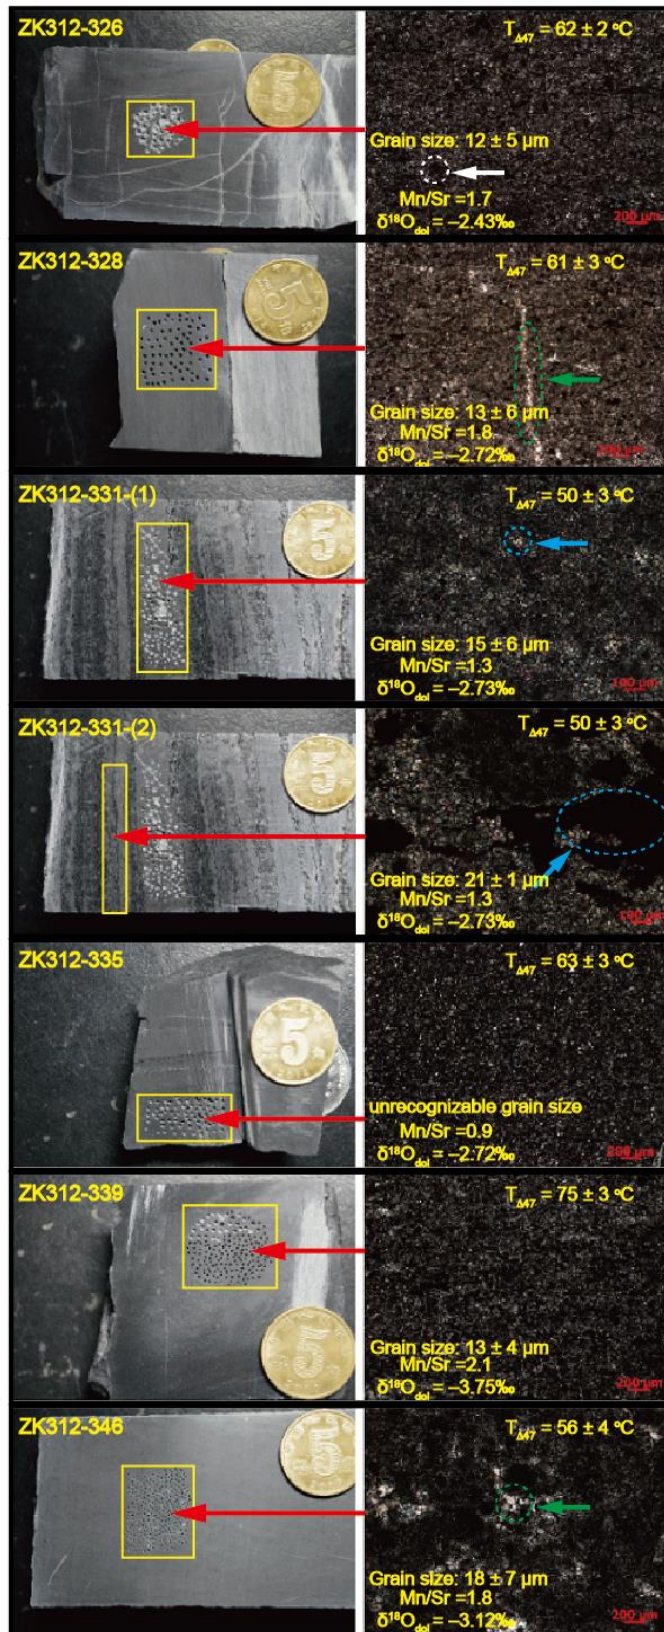

**ZK312-326:**  
 Microcrystalline dolomite and dolosparite containing phosphatic grains (white arrows)

**ZK312-328:**  
 Microcrystalline dolomite and dolosparite containing sparry calcite patches (green arrows) and dispersed phosphatic grains

**ZK312-331-(1):**  
 Microcrystalline dolomite containing dolosparite particles (blue grows) and dispersed phosphatic grains

**ZK312-331-(2):**  
 Microcrystalline dolomite and containing dolosparite particles and phosphatic grains (blue arrows)

**ZK312-335:**  
 Microcrystalline dolomite and dolosparite containing dispersed phosphatic grains

**ZK312-339:**  
 Microcrystalline dolomite and dolosparite containing dispersed phosphatic grains

**ZK312-346:**  
 Microcrystalline dolomite and dolosparite containing sparry calcite patches (green arrows) and phosphatic grains



D Core sample and corresponding photomicrograph

Lithologic description

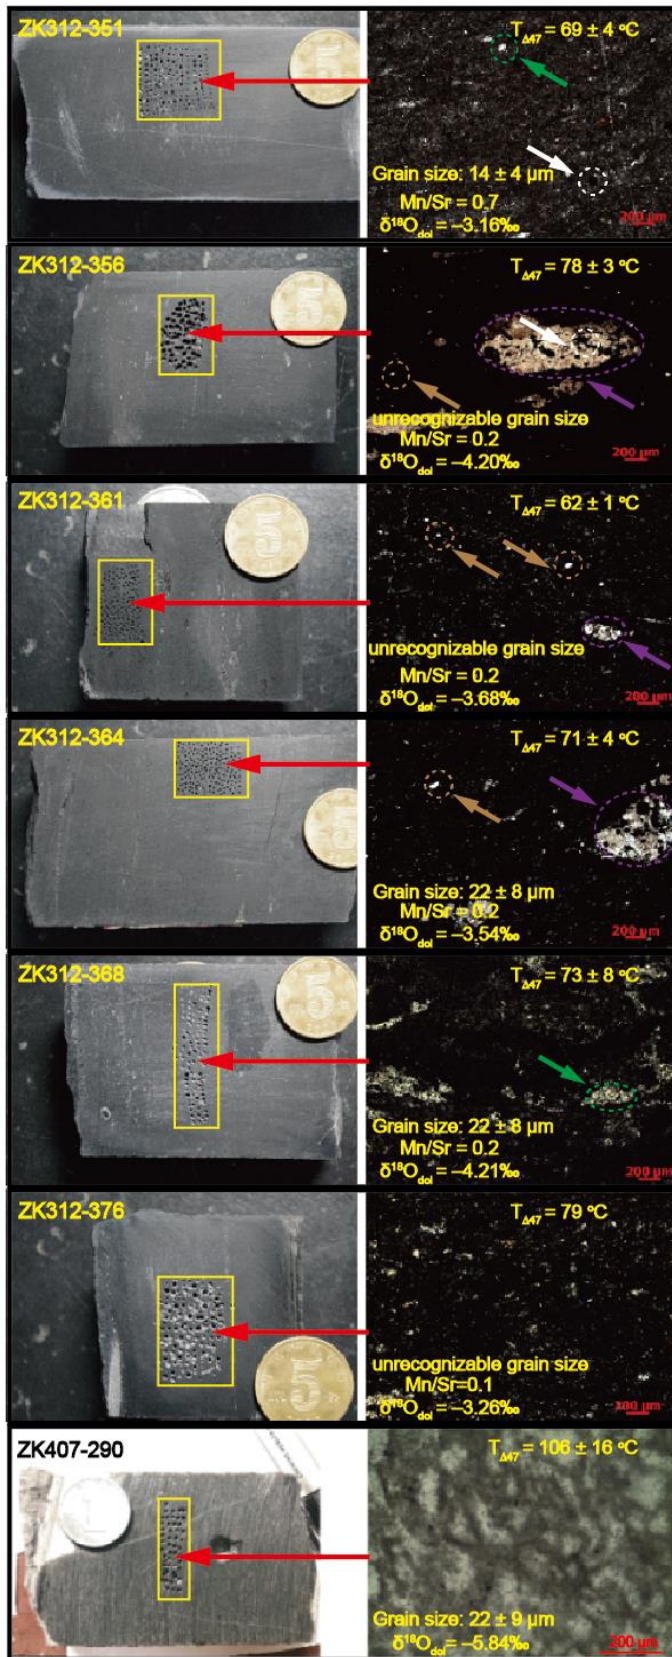

**ZK312-351:**  
Microcrystalline dolomite and dolosparite containing calcsparite (green arrows) phosphatic particles (white arrows)

**ZK312-356:**  
Microcrystalline dolomite containing chalcedony block (purple arrows) and dispersed phosphatic particles (white arrows) and pyrite (brown arrows)

**ZK312-361:**  
Microcrystalline dolomite containing chalcedony block (purple arrows) and pyrite (brown arrows)

**ZK312-364:**  
Microcrystalline dolomite containing chalcedony block (purple arrows) and pyrite (brown arrows)

**ZK312-368:**  
Microcrystalline dolomite containing calcsparite (green arrows) and dispersed phosphatic grains

**ZK312-376:**  
Microcrystalline dolomite containing calcsparite and dispersed phosphatic grains

**ZK407-290:**  
Microcrystalline dolomite and dolosparite containing dispersed phosphatic particles



E Core sample and corresponding photomicrograph

Lithologic description

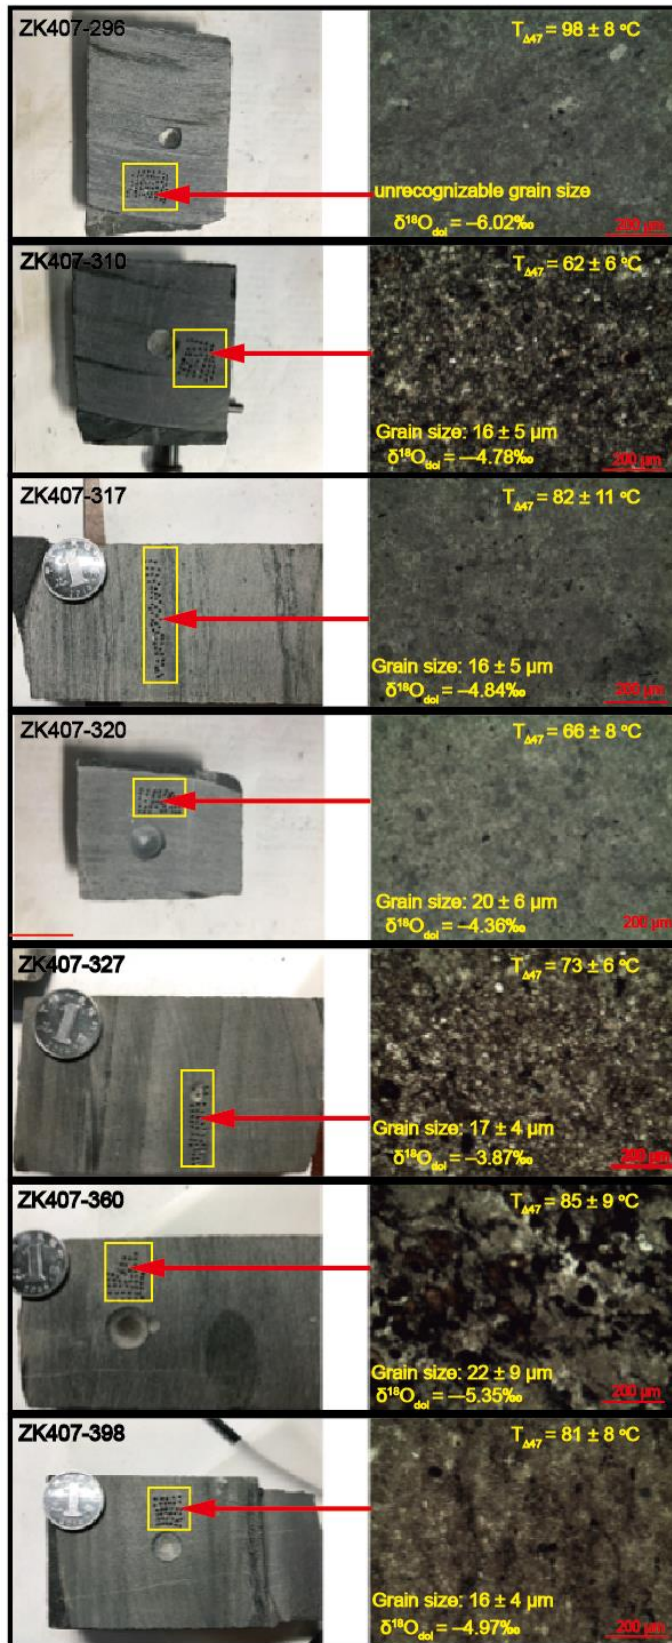

**ZK407-296:**  
 Microcrystalline dolomite  
 containing phosphatic particles

**ZK407-310:**  
 Microcrystalline dolomite  
 and dolosparite containing  
 phosphatic particles

**ZK407-317:**  
 Microcrystalline dolomite  
 containing phosphatic particles

**ZK407-320:**  
 Microcrystalline dolomite  
 containing  
 dispersed phosphatic grains

**ZK407-327:**  
 Microcrystalline dolomite and  
 dolosparite containing  
 phosphatic particles

**ZK407-360:**  
 Microcrystalline dolomite  
 and dolosparite, containing  
 dispersed phosphatic particles

**ZK407-398:**  
 Microcrystalline dolomite  
 containing dispersed  
 phosphatic particles

F Core sample and corresponding photomicrograph

Lithologic description

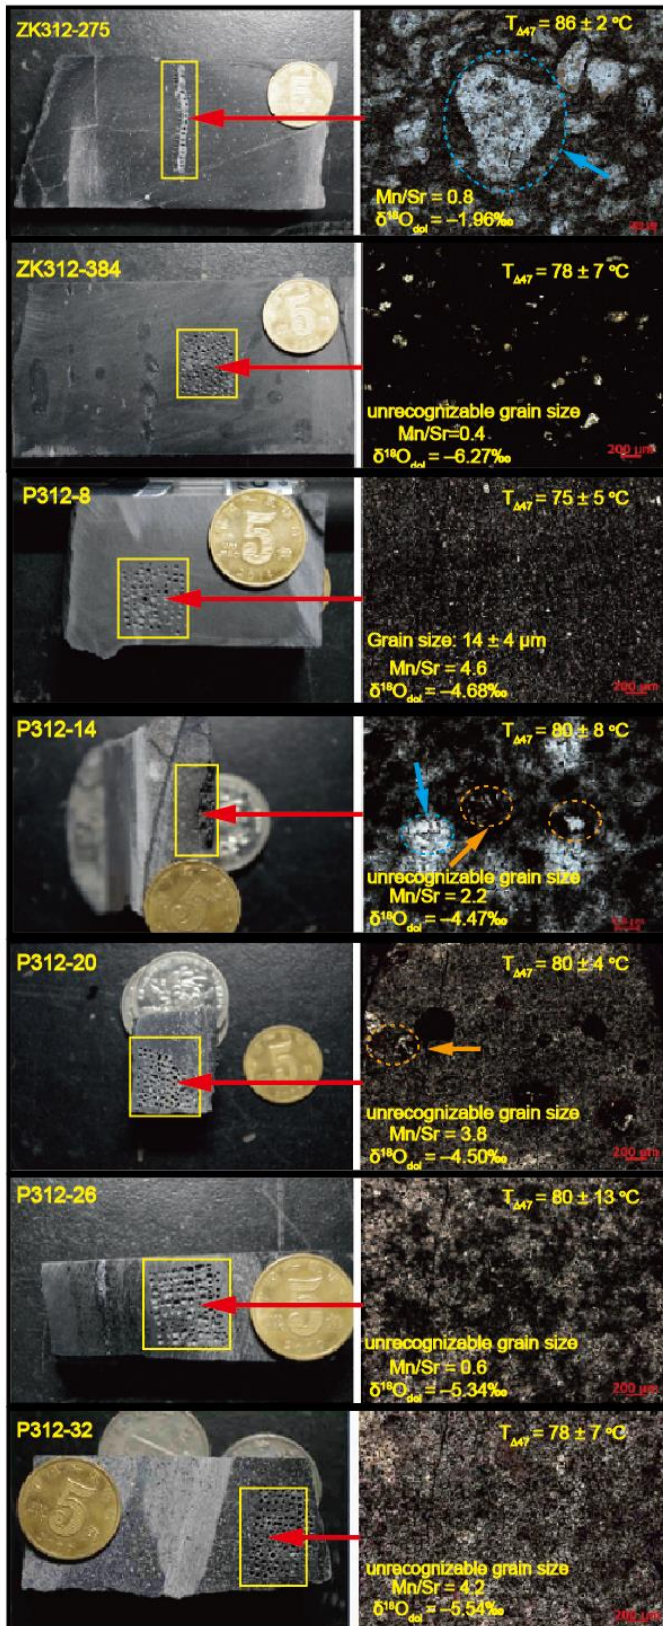

ZK312-275:

Microcrystalline dolomite and dolosparite, containing large chalcedony block, Ca and Si intergrowth (blue arrows)

ZK312-384:

Microcrystalline dolomite containing dolosparite particles and phosphatic grains

P312-8:

Microcrystalline dolomite and dolosparite containing phosphatic particles

P312-14:

Microcrystalline dolomite containing dolosparite particles (blue arrows) and dispersed phosphatic patches. Phosphatic debris carbonatization (orange arrows)

P312-20:

Microcrystalline dolomite and dolosparite containing dispersed phosphatic patches. Phosphatic debris carbonatization (orange arrows)

P312-26:

Microcrystalline dolomite and dolosparite containing large dispersed phosphatic particles

P312-32:

Microcrystalline dolomite and dolosparite particles containing dispersed phosphatic particles



G Core sample and corresponding photomicrograph

Lithologic description

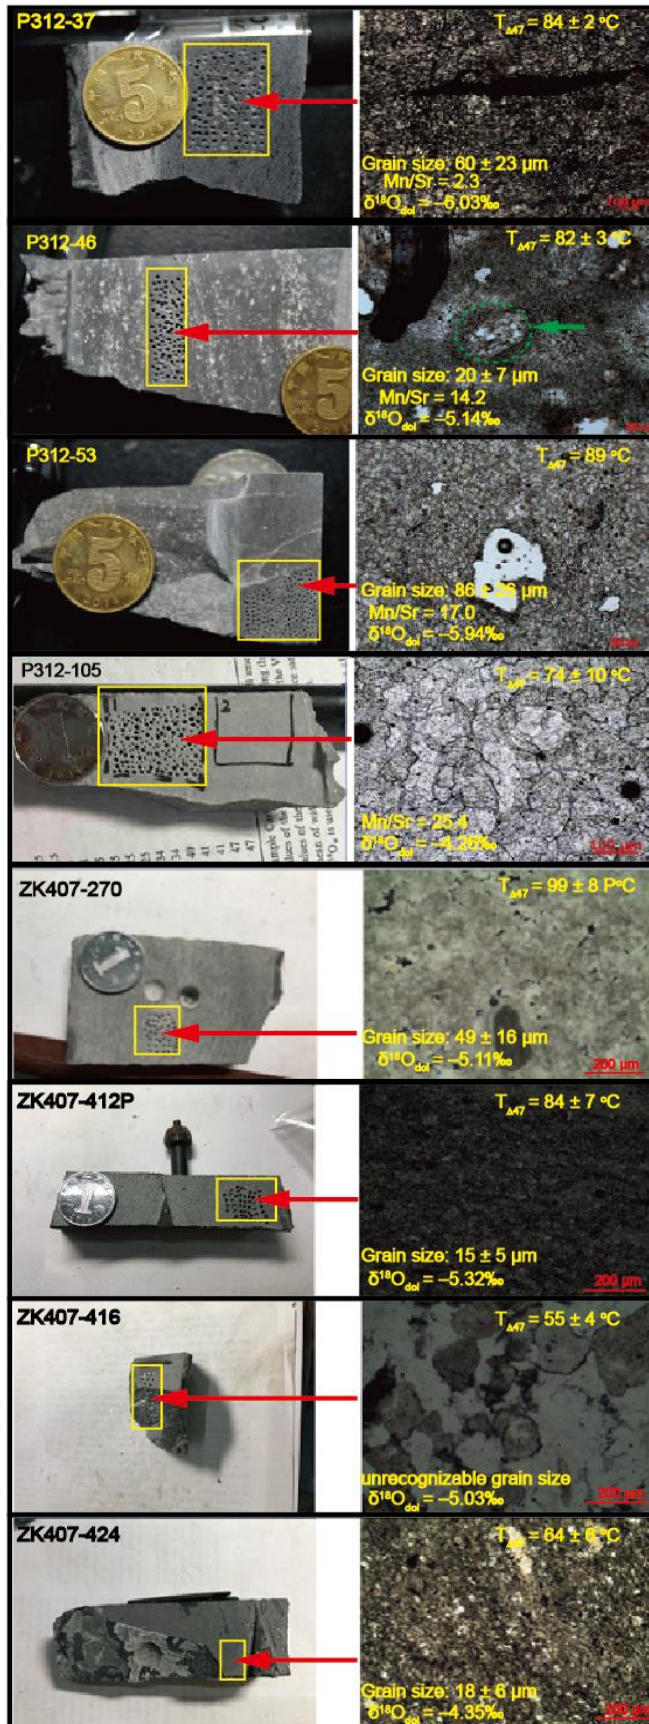

**P312-37:**  
Microcrystalline dolomite and dolosparite particles containing dispersed phosphatic particles

**P312-46:**  
Microcrystalline dolomite and dolosparite, containing large calcited phosphatic patches (blue arrows)

**P312-53:**  
Microcrystalline dolomite and dolosparite, containing phosphatic patches

**P312-105:**  
Microcrystalline dolomite and dolosparite

**ZK407-270:**  
Microcrystalline dolomite and dolosparite containing phosphatic particles

**ZK407-412:**  
Microcrystalline dolomite and dolosparite containing phosphatic particles

**ZK407-416:**  
Microcrystalline dolomite and dolosparite containing phosphatic particles

**ZK407-424:**  
Microcrystalline dolomite and dolosparite containing phosphatic particles

**Fig. S4.** Drillcore segments and corresponding photomicrographs of sampled areas in ZK312-P312 and ZK407 drillcores, including well-preserved samples (*A-E*) and potentially diagenetically altered samples (*F-G*). Geochemical proxies for diagenesis (i.e., Mn/Sr,  $\delta^{18}\text{O}_{\text{dol}}$ , and grain size) and corresponding  $T_{\Delta 47}$  data are shown, as available. Scale: the 1-yuan, 5-jiao and 1-jiao coins have diameters of 2.5 cm, 2.0 cm and 1.8 cm, respectively.



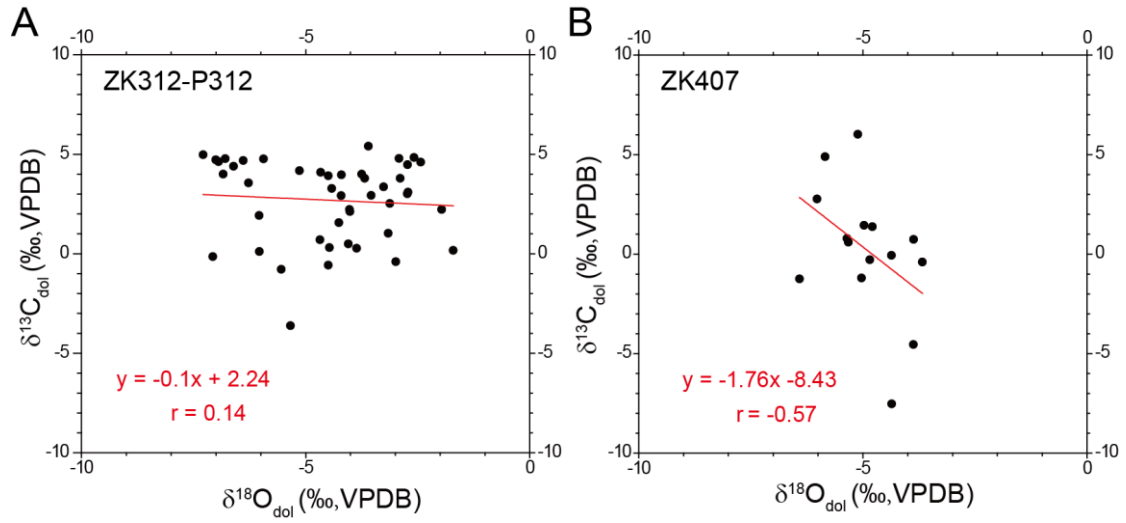

**Fig. S5.** Crossplots of paired carbon ( $\delta^{13}\text{C}_{\text{dol}}$ ) and oxygen isotope ( $\delta^{18}\text{O}_{\text{dol}}$ ) compositions of Doushantuo dolomite samples from the ZK312-P312 (A) and ZK407 drillcores (B).

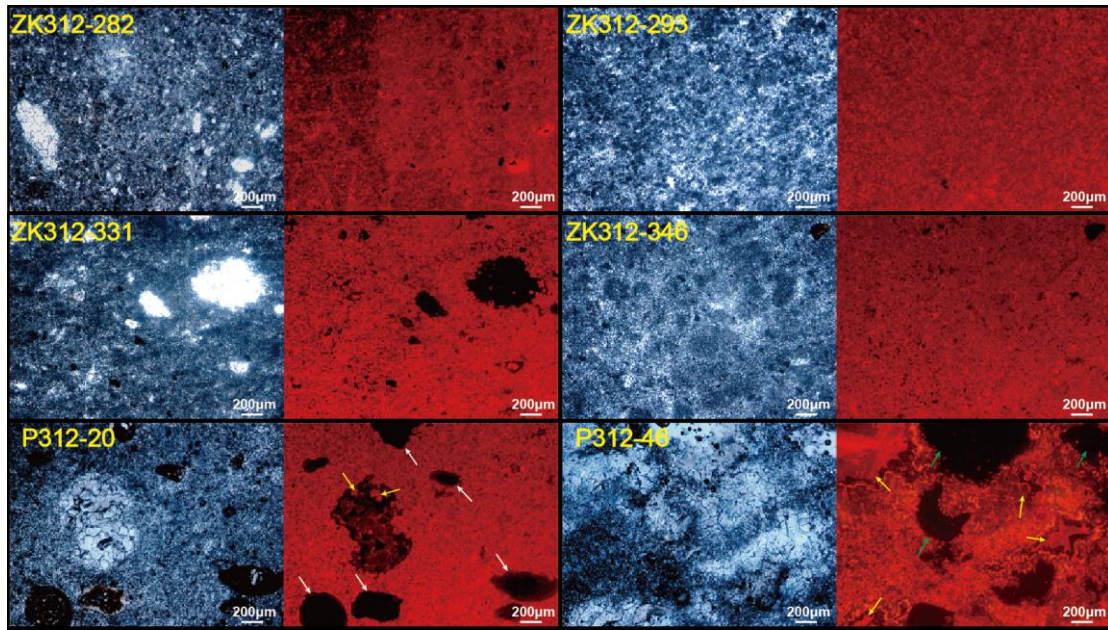

**Fig. S6.** Polarized light (PL; left) and cathodoluminescent (CL; right) images of four typical samples from >50 m depth (ZK312-282, ZK312-293, ZKE312-331 and ZK312-346) and 2 typical samples from <50 m depth (P312-20 and P312-46). The CL images of samples from >50 m depth show no obvious cements. The samples from <50 m depth contain large phosphatic patches (pointed by white arrows), chalcedony block (pointed by green arrows) and dolomite cements (pointed by yellow arrows).



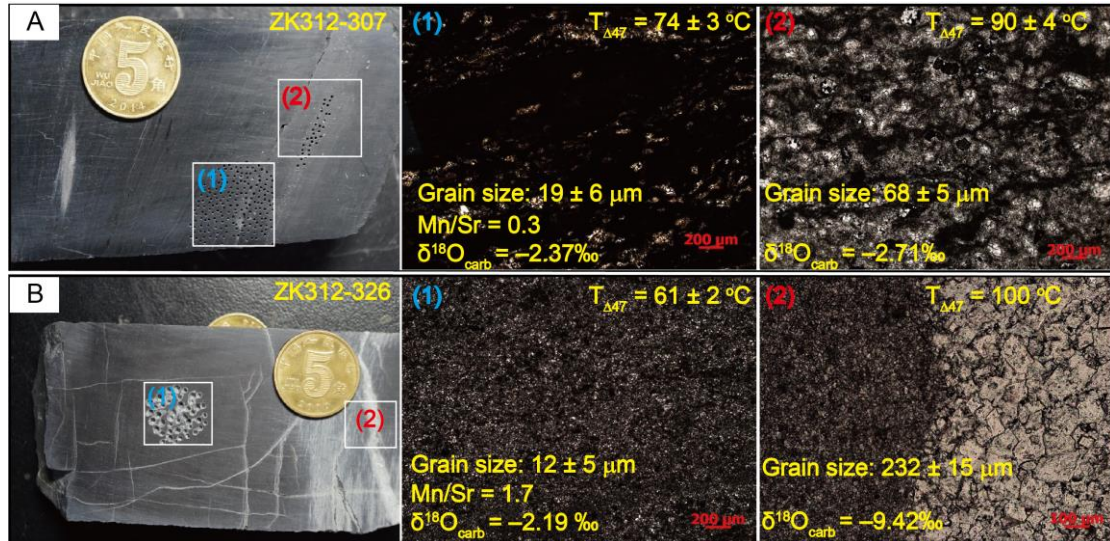

**Fig. S7.** Typical carbonate textures as observed in the sample slab and under microscopy. (A) Sample ZK312-307 includes major microcrystalline dolomite area [labeled as (1)] and minor coarse crystallite dolomite area [labeled as (2)]. (B) Sample ZK312-326 includes major microcrystalline dolomite area [labeled as (1)] and minor veins [labeled as (2)]. In this study, we sampled the microcrystalline dolomite area by micro-drilling while avoiding those coarse crystallite dolomites and veins for sampling. Geochemical proxies for late diagenesis (i.e., Mn/Sr,  $\delta^{18}\text{O}_{\text{dol}}$ , and grain size) and corresponding  $T_{\Delta 47}$  data are shown for references, as available. Scale: 5-jiao coin is 2.0 cm in diameter.

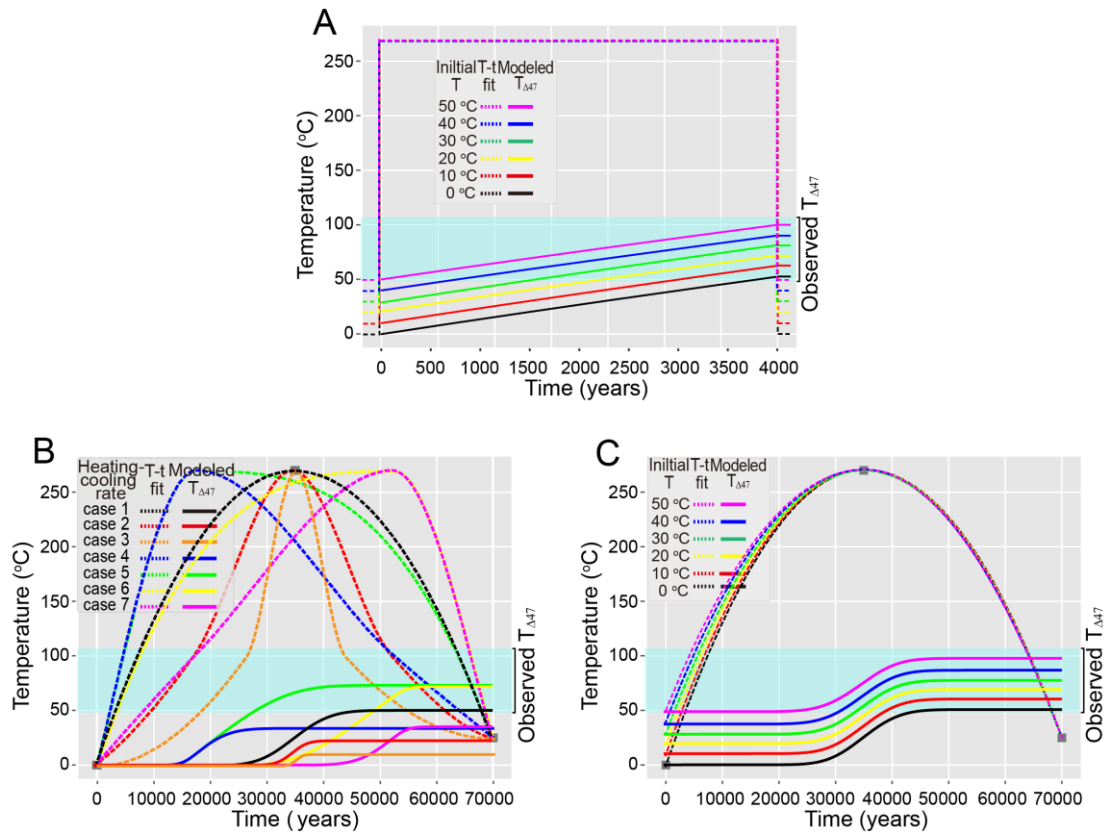

**Fig. S8.** Solid-state reordering modeling of the study Doushantuo Formation based on the dolomite-based “transient defect/equilibrium defect” model (7-8) and the “equilibrium defect” (9) models, which can achieve the  $T_{\Delta 47}$  values (50-106 °C) observed in this study. (A) Dolomite-based “transient defect/equilibrium defect” model (an instantaneous isothermal heating model) results assuming a varying initial temperature from 0 to 50 °C, a heating duration of 4000 years at a peak temperature of 270 °C. (B) “Equilibrium defect” model results for short-duration (70000 years) of hydrothermal events. These simulations assumed an initial temperature of 0 °C, a heating duration of 70000 years at a peak temperature of 270 °C with variable heating-cooling rates, including three symmetric heating-cooling cases (case 1-3) and four asymmetric heating-cooling cases (case 4-7). (C) “Equilibrium defect” model results assuming a varying initial temperature from 0 to 50 °C, a heating duration of 70000 years at a peak temperature of 270 °C, and a fixed heating-cooling rate (i.e., case 1 in B). In subfigures B and C, the “T-t fit” lines denote assumed heating T-time paths, while the “Modeled  $T_{\Delta 47}$ ” lines denote the corresponding  $T_{\Delta 47}$  evolution of the Doushantuo dolomites predicted by a solid-state reordering model. The shallow blue bands represent the range of measured  $T_{\Delta 47}$  values of well-preserved Doushantuo dolomites in this study. See main text for more modeling details.



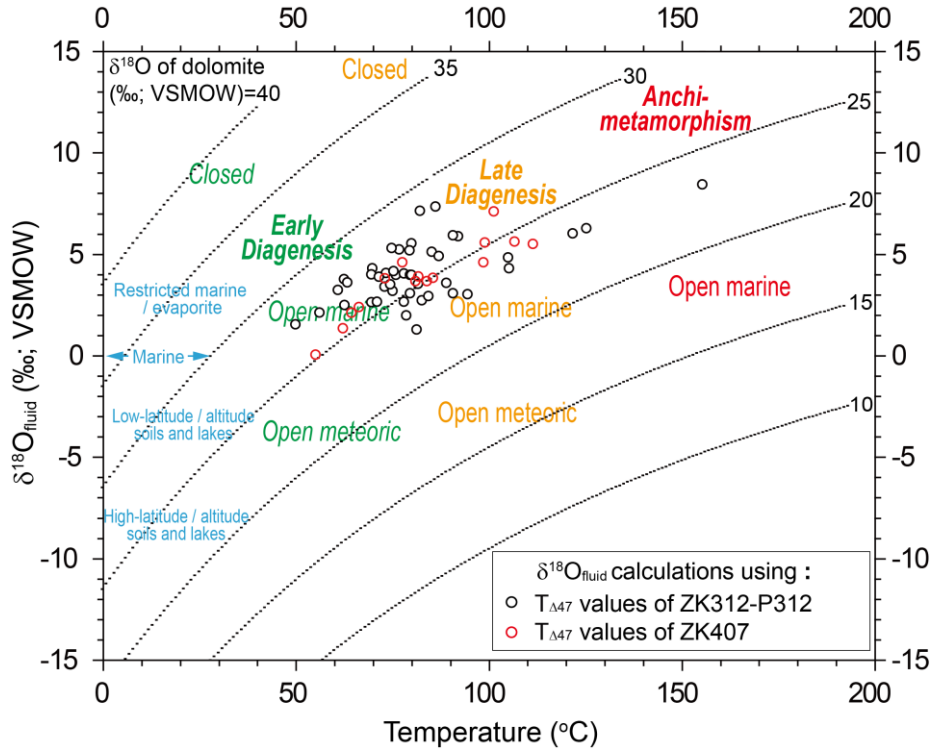

**Fig. S9.** Originally calculated  $\delta^{18}\text{O}$  compositions of the diagenetic fluids ( $\delta^{18}\text{O}_{\text{fluid}}$ ) versus paired  $T_{\Delta 47}$  data for Doushantuo dolomite. Recrystallization environments (colored text: early or late diagenetic or anchi-metamorphic) except for those modern environments (blue texts) are either closed (i.e., rock-buffered) or open (i.e., fluid-buffered). Reference isotopic compositions for carbonates and co-existing diagenetic fluids equilibrated over a range of geological conditions were adopted from [ref. 10](#), but updated to the  $\delta^{18}\text{O}$  compositions of dolomite. See Methods for further explanation of calculations and the text for detailed interpretations.

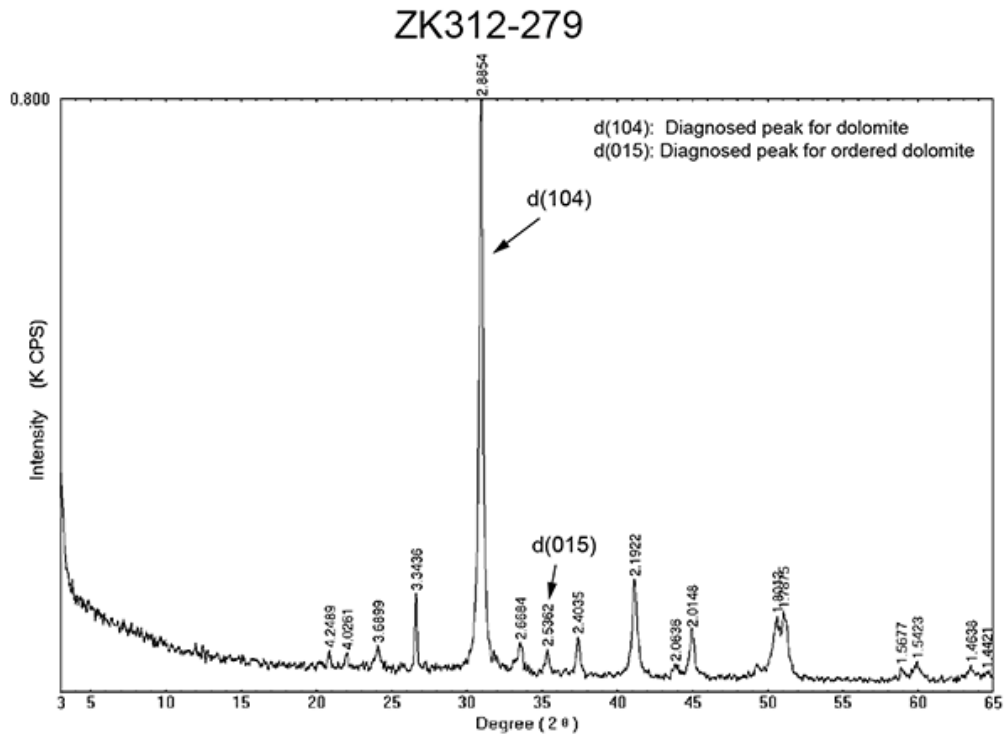

**Fig. S10.** Representative X-ray diffraction (XRD) spectrum for the Doushantuo Formation (sample ZK312-279). XRD spectra indicate that all study samples consist dominantly of ordered dolomite.

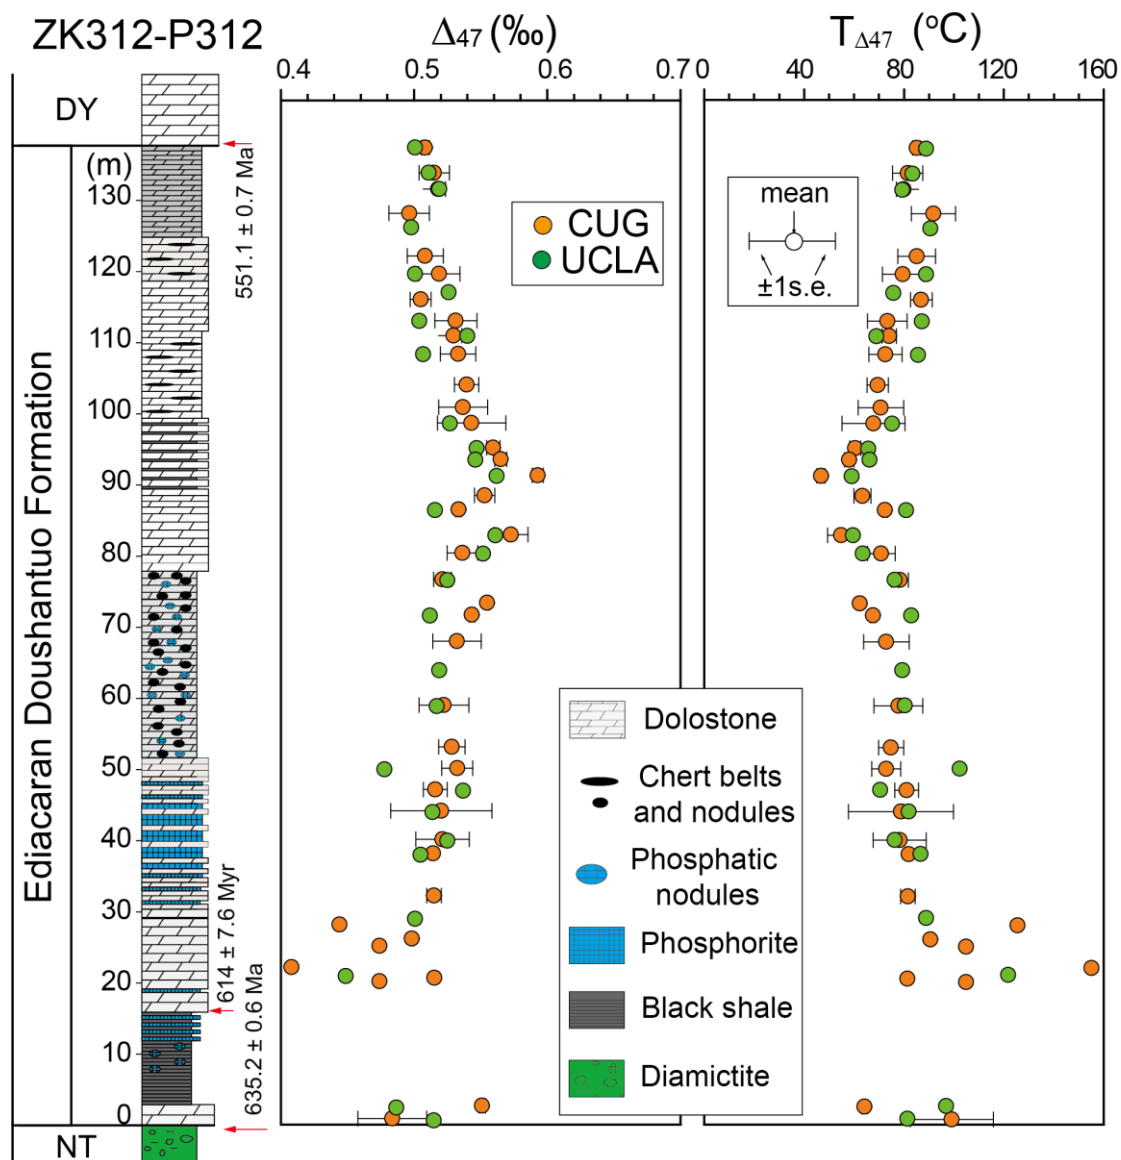

**Fig. S11.** Comparison of  $\Delta_{47}$  and  $T_{\Delta 47}$  data measured at University of California-Los Angeles (UCLA) (green symbols) and at China University of Geosciences-Wuhan (CUG-W) (orange symbols). The two datasets show almost the same values and stratigraphic trends through the Doushantuo Formation, confirming the robustness of our  $\Delta_{47}$  and  $T_{\Delta 47}$  data. NT = Nantuo Formation, DY = Dengying Formation.



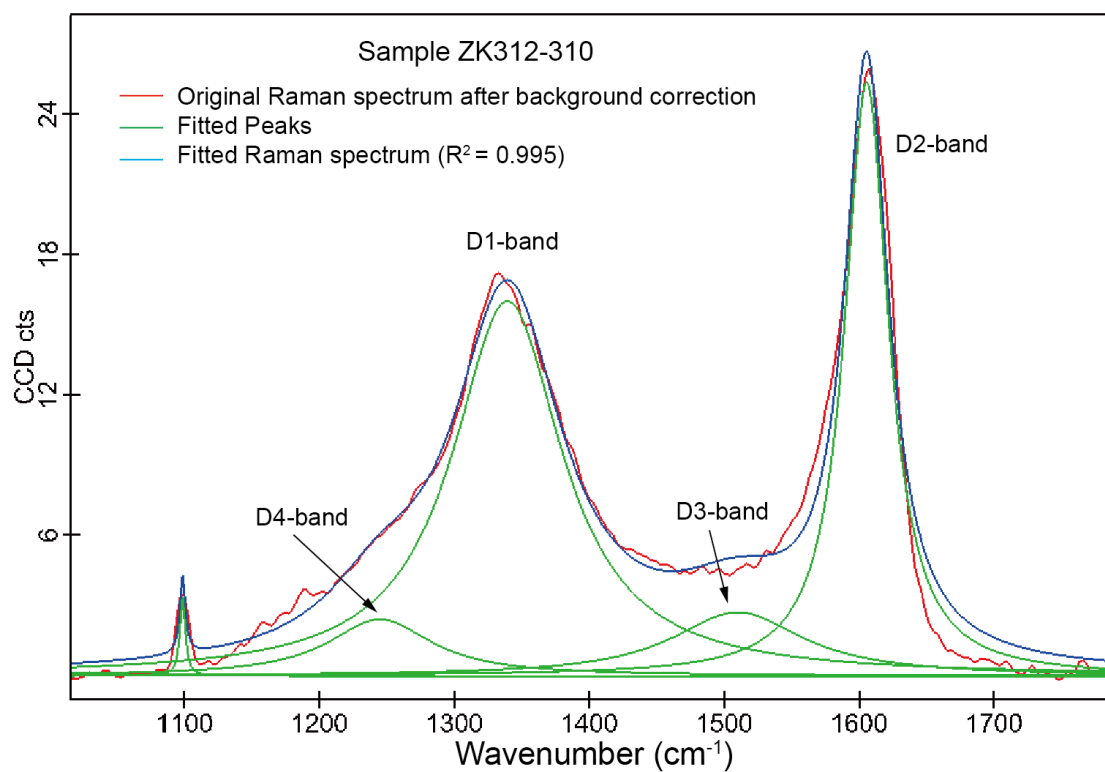

**Fig. S12.** Representative Raman spectra of organic matter (OM) of Doushantuo sample ZK312-310. Four discriminative bands (D1, D2, D3, and D4; green) are marked. The method of peak decomposition was adopted from [ref. 11](#). The coefficient of variation ( $R^2 = 0.995$ ) compares the original spectrum (red) with the fitted Raman spectrum (blue). CCD cts = charge-coupled device counts.

**Table S1. Composite temperature- or diagenesis-related geochemical and petrographic data of dolomites from the Doushantuo Formation.**

| Sample ID | Height in ZK312-P312 (m) | $\Delta_{47}$ (‰) <sup>a</sup> | $T_{A47}$ (°C) <sup>b</sup> | $T_{A47}$ (°C) <sup>c</sup> | $T_{A47}$ (°C) <sup>d</sup> | $T_{A47}$ (°C) <sup>e</sup> | $T_{A47}$ (°C) <sup>f</sup> | Initial $T_{A47}$ (°C) by modeling <sup>g</sup> | Initial $T_{A47}$ (°C) by modeling <sup>h</sup> | avg. $\delta^{13}C_{carb}$ (VPDB, ‰) | avg. $\delta^{18}O_{carb}$ (VPDB, ‰) | $\delta^{18}O_{fluid}$ (VSMOW, ‰) <sup>i</sup> | $\delta^{18}O_{fluid}$ (VSMOW, ‰) <sup>j</sup> | Grain size ( $\mu m$ ) | Grain size 1 s.d. ( $\mu m$ ) | Dolomite (wt %) <sup>k</sup> | Raman of OM FWHM-D1 (cm <sup>-1</sup> ) | Raman of OM FWHM-D2 (cm <sup>-1</sup> ) | Peak heating Temperature based on D1 (°C) | Peak heating temperature based on D2 (°C) | Average peak heating temperatures of D1 and D2 (°C) | $R_{0,mv}$ (%) | $R_0$ (%) | Peak heating temperature based on $R_0$ (°C) |  |
|-----------|--------------------------|--------------------------------|-----------------------------|-----------------------------|-----------------------------|-----------------------------|-----------------------------|-------------------------------------------------|-------------------------------------------------|--------------------------------------|--------------------------------------|------------------------------------------------|------------------------------------------------|------------------------|-------------------------------|------------------------------|-----------------------------------------|-----------------------------------------|-------------------------------------------|-------------------------------------------|-----------------------------------------------------|----------------|-----------|----------------------------------------------|--|
| ZK312-275 | 137.3                    | 0.507                          | 107                         | 90                          | 100                         | 114                         | <b>86</b>                   | 34                                              | 36                                              | 2.2                                  | -2.0                                 | 7.4                                            | -0.1                                           |                        |                               | 95                           |                                         |                                         |                                           |                                           |                                                     |                |           |                                              |  |
| ZK312-279 | 133.8                    | 0.515                          | 102                         | 86                          | 95                          | 108                         | <b>82</b>                   | 29                                              | 32                                              | 0.2                                  | -1.7                                 | 7.2                                            | -0.7                                           | 10                     | 4                             | 95                           | 97.4                                    | 64.5                                    | 260                                       | 269                                       | 264                                                 |                |           |                                              |  |
| ZK407-270 | 132.4                    | 0.485                          | 121                         | 103                         | 114                         | 132                         | <b>99</b>                   | 47                                              | 50                                              | 6.0                                  | -5.1                                 | 5.6                                            | -0.9                                           | 49                     | 16                            |                              |                                         |                                         |                                           |                                           |                                                     |                |           |                                              |  |
| ZK312-282 | 131.5                    | 0.519                          | 99                          | 84                          | 93                          | 106                         | <b>80</b>                   | 27                                              | 29                                              | -0.4                                 | -3.0                                 | 5.6                                            | -2.5                                           | 17                     | 8                             | 91                           | 86.5                                    | 66.2                                    | 265                                       | 292                                       | 279                                                 |                |           |                                              |  |
| ZK312-286 | 128.1                    | 0.497                          | 113                         | 96                          | 106                         | 122                         | <b>92</b>                   | 40                                              | 43                                              | 0.5                                  | -4.0                                 | 5.9                                            | -1.1                                           | 10                     | 4                             | 91                           | 93.4                                    | 65.1                                    | 253                                       | 277                                       | 265                                                 |                |           |                                              |  |
| ZK312-288 | 126.1                    | 0.499                          | 112                         | 95                          | 105                         | 121                         | <b>91</b>                   | 38                                              | 41                                              | 0.3                                  | -3.9                                 | 6.0                                            | -1.1                                           | 8                      | 3                             | 93                           |                                         |                                         |                                           |                                           |                                                     | 3.5            | 2.58      | 275                                          |  |
| ZK312-293 | 122.1                    | 0.509                          | 105                         | 89                          | 99                          | 113                         | <b>85</b>                   | 33                                              | 35                                              | 2.2                                  | -4.0                                 | 5.2                                            | -2.4                                           | 11                     | 4                             | 98                           | 87.9                                    | 65.9                                    | 288                                       | 289                                       | 289                                                 |                |           |                                              |  |
| ZK312-296 | 119.6                    | 0.514                          | 102                         | 87                          | 96                          | 109                         | <b>82</b>                   | 30                                              | 32                                              | 1.9                                  | -6.0                                 | 2.8                                            | -5.1                                           | 14                     | 6                             | 93                           | 91.7                                    | 65.4                                    | 281                                       | 281                                       | 281                                                 |                |           |                                              |  |
| ZK407-290 | 119.3                    | 0.473                          | 130                         | 110                         | 122                         | 143                         | <b>106</b>                  | 55                                              | 58                                              | 4.9                                  | -5.8                                 | 5.6                                            | -0.3                                           | 22                     | 9                             |                              |                                         |                                         |                                           |                                           |                                                     |                |           |                                              |  |
| ZK312-299 | 117.0                    | 0.527                          | 94                          | 80                          | 88                          | 100                         | <b>76</b>                   | 23                                              | 25                                              | 2.1                                  | -4.0                                 | 4.0                                            | -4.5                                           | 15                     | 4                             | 98                           | 92.9                                    | 65.2                                    | 257                                       | 278                                       | 268                                                 |                |           |                                              |  |
| ZK312-300 | 116.0                    | 0.506                          | 107                         | 91                          | 100                         | 115                         | <b>87</b>                   | 34                                              | 37                                              | 3.3                                  | -4.4                                 | 5.0                                            | -2.5                                           | 15                     | 4                             | 60                           |                                         |                                         |                                           |                                           |                                                     |                |           |                                              |  |
| ZK407-296 | 115.8                    | 0.486                          | 121                         | 102                         | 113                         | 131                         | <b>98</b>                   | 46                                              | 50                                              | 2.8                                  | -6.0                                 | 4.6                                            | -1.9                                           |                        |                               |                              |                                         |                                         |                                           |                                           |                                                     |                |           |                                              |  |
| ZK312-304 | 113.0                    | 0.525                          | 96                          | 81                          | 89                          | 101                         | <b>77</b>                   | 24                                              | 26                                              | 3.8                                  | -2.9                                 | 5.3                                            | -3.1                                           | 14                     | 5                             | 92                           | 97.6                                    | 64.5                                    | 262                                       | 268                                       | 265                                                 | 4.3            | 3.05      | 297                                          |  |
| ZK312-307 | 110.9                    | 0.532                          | 91                          | 78                          | 86                          | 97                          | <b>73</b>                   | 20                                              | 22                                              | 5.4                                  | -3.6                                 | 4.1                                            | -4.6                                           | 19                     | 6                             | 99                           |                                         |                                         |                                           |                                           |                                                     | 3.0            | 2.26      | 258                                          |  |
| ZK312-310 | 108.3                    | 0.529                          | 93                          | 79                          | 87                          | 99                          | <b>75</b>                   | 22                                              | 24                                              | 4.8                                  | -2.6                                 | 5.4                                            | -3.2                                           | 22                     | 8                             | 99                           | 98.3                                    | 64.4                                    | 265                                       | 267                                       | 266                                                 |                |           |                                              |  |





|            |      |       |     |     |     |     |            |     |     |      |      |     |       |    |    |    |      |      |     |     |     |
|------------|------|-------|-----|-----|-----|-----|------------|-----|-----|------|------|-----|-------|----|----|----|------|------|-----|-----|-----|
| ZK407-412p | 50.4 | 0.512 | 103 | 88  | 97  | 111 | <b>83</b>  | 31  | 33  | 0.6  | -5.3 | 3.6 | -4.1  | 15 | 5  |    |      |      |     |     |     |
| P312-14    | 50.0 | 0.520 | 98  | 83  | 92  | 105 | <b>79</b>  | 27  | 29  | 0.3  | -4.5 | 4.0 | -4.1  |    |    |    |      |      | 97  |     |     |
| P312-20    | 47.0 | 0.519 | 99  | 84  | 93  | 106 | <b>80</b>  | 27  | 29  | -0.6 | -4.5 | 4.0 | -4.1  |    |    |    |      |      | 97  |     |     |
| ZK407-416  | 46.1 | 0.573 | 70  | 59  | 65  | 72  | <b>55</b>  | 1   | 2   | -1.2 | -5.0 | 0.1 | -11.0 |    |    |    |      |      |     |     |     |
| P312-26    | 44.0 | 0.520 | 98  | 83  | 92  | 105 | <b>79</b>  | 27  | 29  | -3.6 | -5.3 | 3.1 | -5.0  |    |    |    |      |      | 80  |     |     |
| P312-32    | 40.0 | 0.523 | 97  | 82  | 91  | 103 | <b>78</b>  | 25  | 27  | -0.8 | -5.5 | 2.7 | -5.6  |    |    |    |      |      | 93  |     |     |
| P312-37    | 38.0 | 0.511 | 104 | 88  | 97  | 111 | <b>84</b>  | 32  | 34  | 0.1  | -6.0 | 3.0 | -4.7  | 60 | 23 |    |      |      | 93  |     |     |
| ZK407-424  | 35.4 | 0.552 | 81  | 68  | 75  | 84  | <b>64</b>  | 11  | 12  | -7.5 | -4.4 | 2.1 | -7.8  | 18 | 6  |    |      |      |     |     |     |
| P312-46    | 32.1 | 0.516 | 101 | 86  | 95  | 108 | <b>81</b>  | 29  | 31  | 4.2  | -5.1 | 3.6 | -4.4  | 20 | 7  |    |      |      | 98  |     |     |
| ZK407-428  | 31.1 | 0.465 | 137 | 115 | 128 | 151 | <b>111</b> | 60  | 64  | -1.3 | -6.4 | 5.5 | -0.1  | 33 | 11 |    |      |      |     |     |     |
| P312-53    | 29.0 | 0.502 | 110 | 93  | 103 | 118 | <b>89</b>  | 37  | 39  | 4.8  | -5.9 | 3.6 | -3.6  | 86 | 26 |    |      |      | 98  |     |     |
| P312-55    | 28.0 | 0.445 | 154 | 129 | 144 | 172 | <b>125</b> | 75  | 79  | 4.0  | -6.8 | 6.4 | 1.6   |    |    |    |      |      |     |     |     |
| P312-58    | 26.0 | 0.499 | 112 | 95  | 105 | 121 | <b>91</b>  | 38  | 41  | 4.4  | -6.6 | 3.1 | -4.0  |    |    |    |      |      |     |     |     |
| P312-60    | 25.0 | 0.475 | 129 | 109 | 121 | 141 | <b>105</b> | 53  | 57  | 4.7  | -6.4 | 4.9 | -1.1  |    |    |    |      |      | 98  |     |     |
| P312-66    | 22.0 | 0.409 | 191 | 158 | 179 | 221 | <b>155</b> | 106 | 112 | 4.7  | -7.0 | 8.5 | 5.1   |    |    |    |      |      | 98  |     |     |
| P312-67    | 21.0 | 0.450 | 149 | 125 | 140 | 167 | <b>122</b> | 71  | 75  | 4.8  | -6.8 | 6.1 | 1.1   |    |    |    |      |      | 98  |     |     |
| P312-68    | 20.5 | 0.516 | 101 | 86  | 95  | 108 | <b>81</b>  | 29  | 31  | 5.0  | -7.3 | 1.4 | -6.6  |    |    |    |      |      |     |     |     |
| P312-70    | 20.0 | 0.475 | 129 | 109 | 121 | 141 | <b>105</b> | 53  | 57  | 4.6  | -6.9 | 4.3 | -1.7  |    |    |    |      |      | 98  |     |     |
| P312-105   | 2.5  | 0.530 | 93  | 79  | 87  | 98  | <b>74</b>  | 21  | 23  | 1.6  | -4.3 | 3.6 | -5.1  |    |    | 98 | 97.1 | 64.6 | 287 | 269 | 278 |
| P312-114   | 0.7  | 0.492 | 116 | 99  | 109 | 126 | <b>95</b>  | 43  | 46  | -0.1 | -7.1 | 3.1 | -3.7  |    |    | 98 | 107  | 63.1 | 254 | 248 | 251 |

<sup>a</sup> We used  $\Delta_{47}$  to replace the STF- $\Delta_{47\text{ARF}25}$ . The STF- $\Delta_{47\text{ARF}25}$  value was calibrated by applying the Standards Transfer Function to average  $\Delta_{47\text{ARF}25}$  value. The average  $\Delta_{47\text{ARF}25}$  value was calculated using the repeated  $\Delta_{47\text{ARF}25}$  values. The  $\Delta_{47\text{ARF}25}$  value was calculated from Brand raw  $\Delta_{47}$  value by applying it to the absolute reference frame (12) and then scaling it to a 25 °C phosphoric acid reaction by addition of a 0.082‰ temperature correction factor for 90 °C reactions (13). The Brand raw  $\Delta_{47}$  value was calculated by converting our measured raw  $\delta_{45}$ , raw  $\delta_{46}$ , raw  $\delta_{47}$ , raw  $\delta_{48}$  and raw  $\delta_{49}$  values into the Brand parameter frame (14, 15) (details see Table S3).

<sup>b</sup> The  $T_{\Delta 47}$  values were calculated using the calcite temperature calibration in ref. 16.

<sup>c</sup>The  $T_{\Delta 47}$  values were calculated using the calcite temperature calibration in [ref. 17](#).

<sup>d</sup>The  $T_{\Delta 47}$  values were calculated using the dolomite temperature calibration in [ref. 18](#).

<sup>e</sup>The  $T_{\Delta 47}$  value was calculated using the Brand parameter-based calcite temperature calibration in [ref. 19](#).

<sup>f</sup>The  $T_{\Delta 47}$  values were calculated using the revised dolomite temperature calibration in this study.

<sup>g</sup>The initial  $T_{\Delta 47}$  value was derived from the modeling of the solid-state reordering effects by assuming a peak heating temperature of 270 °C for **2000** years based on the  $T_{\Delta 47}$  values in this study and the exchange-diffusion kinetic model from [ref. 8](#) (see text for details).

<sup>h</sup>The initial  $T_{\Delta 47}$  value was derived from the modeling of the solid-state reordering effects by assuming a peak heating temperature of 270 °C for **4000** years based on the  $T_{\Delta 47}$  values in this study and the transient defect/equilibrium defect model in [ref. 7](#) (see text for details).

<sup>i</sup>The  $\delta^{18}\text{O}_{\text{fluid}}$  (VSMOW, ‰) value was calculated using the  $T_{\Delta 47}$  value which was calculated by using the revised dolomite temperature calibration in this study.

<sup>j</sup>The  $\delta^{18}\text{O}_{\text{fluid}}$  (VSMOW, ‰) value was calculated using the initial  $T_{\Delta 47}$  value from modeling which is based on an exchange-diffusion kinetic solid-state reordering model in [ref. 8](#) by assuming a hydrothermal event with a peak heating of 270°C for 2000 years (see text for details).

<sup>k</sup>Data were generated by XRD with an uncertainty of ca.  $\pm 5\%$ .

**Table S2. The summarized  $\Delta_{47}$  values (CUG and UCLA) and  $T_{\Delta 47}$  values of dolomite samples from the Doushantuo Formation in this study.**

| Analysis #                | Date       | Laboratory | Sample ID | Height (m) | $\delta^{13}\text{C}$<br>(VPDB,‰) | $\delta^{18}\text{O}$<br>(VPDB,‰) | $\Delta_{47\text{ARF25}}$ (‰) | STF-<br>$\Delta_{47\text{ARF25}}$ (‰) <sup>a</sup> | Average $\Delta_{47}$ (‰) | n | Average $\Delta_{47}$<br>1 s.d. (‰) <sup>b</sup> | Average $\Delta_{47}$<br>1 s.e. (‰) <sup>c</sup> | $T_{\Delta 47}$ (°C) | $T_{\Delta 47}$ 1 s.e. (°C) |
|---------------------------|------------|------------|-----------|------------|-----------------------------------|-----------------------------------|-------------------------------|----------------------------------------------------|---------------------------|---|--------------------------------------------------|--------------------------------------------------|----------------------|-----------------------------|
| <b>ZK312-P312 section</b> |            |            |           |            |                                   |                                   |                               |                                                    |                           |   |                                                  |                                                  |                      |                             |
| 49355                     | 150925-34  | CUG        | ZK312-275 | 137.3      | 2.11                              | -2.87                             | 0.531                         | 0.515                                              | 0.507                     | 4 | 0.0054                                           | 0.003                                            | 86                   | 2                           |
| 49025                     | 150908-22  | CUG        | ZK312-275 |            | 2.17                              | -2.61                             | 0.523                         | 0.507                                              |                           |   |                                                  |                                                  |                      |                             |
|                           | 201512     | UCLA       | ZK312-275 |            | 2.34                              | -0.01                             |                               | 0.502                                              |                           |   |                                                  |                                                  |                      |                             |
| 49035                     | 150908-23  | CUG        | ZK312-275 |            | 2.28                              | -2.37                             | 0.521                         | 0.505                                              |                           |   |                                                  |                                                  |                      |                             |
| 49365                     | 150925-35  | CUG        | ZK312-279 | 133.8      | 0.10                              | -1.78                             | 0.537                         | 0.521                                              | 0.515                     | 4 | 0.0161                                           | 0.008                                            | 82                   | 4                           |
| 49055                     | 150908-25  | CUG        | ZK312-279 |            | 0.06                              | -1.77                             | 0.548                         | 0.532                                              |                           |   |                                                  |                                                  |                      |                             |
|                           | 201512     | UCLA       | ZK312-279 |            | 0.31                              | -1.63                             |                               | 0.512                                              |                           |   |                                                  |                                                  |                      |                             |
| 49870                     | 151011-34  | CUG        | ZK312-279 |            | 0.19                              | -1.65                             | 0.510                         | 0.494                                              |                           |   |                                                  |                                                  |                      |                             |
| 5255                      | 20190215-2 | CUG        | ZK312-282 | 131.5      | -0.24                             | -2.90                             | 0.513                         | 0.517                                              | 0.519                     | 5 | 0.0099                                           | 0.004                                            | 80                   | 2                           |
| 5420                      | 20190218-4 | CUG        | ZK312-282 |            | -0.22                             | -2.94                             | 0.506                         | 0.504                                              |                           |   |                                                  |                                                  |                      |                             |
| 5610                      | 20190222-4 | CUG        | ZK312-282 |            | -0.22                             | -3.09                             | 0.524                         | 0.524                                              |                           |   |                                                  |                                                  |                      |                             |
|                           | 201512     | UCLA       | ZK312-282 |            | -0.43                             | -2.85                             |                               | 0.520                                              |                           |   |                                                  |                                                  |                      |                             |
| 56808                     | 160422-21  | CUG        | ZK312-282 |            | -0.90                             | -3.16                             | 0.534                         | 0.530                                              |                           |   |                                                  |                                                  |                      |                             |
| 49105                     | 150912-21  | CUG        | ZK312-286 | 128.1      | 0.47                              | -3.99                             | 0.498                         | 0.482                                              | 0.497                     | 2 | 0.0210                                           | 0.015                                            | 92                   | 8                           |
| 49375                     | 150925-36  | CUG        | ZK312-286 |            | 0.52                              | -4.10                             | 0.528                         | 0.512                                              |                           |   |                                                  |                                                  |                      |                             |
|                           | 201512     | UCLA       | ZK312-288 | 126.1      | 0.27                              | -3.86                             |                               | 0.499                                              | 0.499                     | 1 |                                                  |                                                  | 91                   |                             |
| 49115                     | 150912-22  | CUG        | ZK312-293 | 122.1      | 2.30                              | -4.01                             | 0.499                         | 0.483                                              | 0.509                     | 3 | 0.0236                                           | 0.014                                            | 85                   | 7                           |



|       |            |      |           |       |      |       |       |       |       |   |        |       |    |   |  |
|-------|------------|------|-----------|-------|------|-------|-------|-------|-------|---|--------|-------|----|---|--|
| 49398 | 150927-31  | CUG  | ZK312-293 |       | 2.29 | -4.26 | 0.531 | 0.515 |       |   |        |       |    |   |  |
| 58898 | 160522-C12 | CUG  | ZK312-293 |       | 2.07 | -3.78 | 0.532 | 0.529 |       |   |        |       |    |   |  |
| 49413 | 150927-32  | CUG  | ZK312-296 | 119.6 | 1.96 | -6.21 | 0.551 | 0.535 | 0.514 | 3 | 0.0185 | 0.011 | 83 | 6 |  |
|       | 201512     | UCLA | ZK312-296 |       | 2.10 | -5.99 |       | 0.502 |       |   |        |       |    |   |  |
| 59060 | 160528-E1  | CUG  | ZK312-296 |       | 1.70 | -5.91 | 0.510 | 0.504 |       |   |        |       |    |   |  |
|       | 201512     | UCLA | ZK312-299 | 117.0 | 2.12 | -4.01 |       | 0.527 | 0.527 | 1 |        |       | 76 |   |  |
| 49125 | 150912-23  | CUG  | ZK312-300 | 116.0 | 3.34 | -4.63 | 0.537 | 0.521 | 0.506 | 3 | 0.0135 | 0.008 | 87 | 4 |  |
| 49423 | 150927-33  | CUG  | ZK312-300 |       | 3.41 | -4.53 | 0.516 | 0.500 |       |   |        |       |    |   |  |
| 60178 | 160614-G2  | CUG  | ZK312-300 |       | 3.09 | -4.09 | 0.502 | 0.496 |       |   |        |       |    |   |  |
| 49135 | 150912-24  | CUG  | ZK312-304 | 113.0 | 4.01 | -3.45 | 0.517 | 0.501 | 0.525 | 4 | 0.0263 | 0.013 | 77 | 6 |  |
| 49433 | 150927-34  | CUG  | ZK312-304 |       | 3.77 | -2.91 | 0.568 | 0.552 |       |   |        |       |    |   |  |
|       | 201512     | UCLA | ZK312-304 |       | 3.83 | -2.69 |       | 0.505 |       |   |        |       |    |   |  |
| 59099 | 160528-E2  | CUG  | ZK312-304 |       | 3.56 | -2.51 | 0.546 | 0.543 |       |   |        |       |    |   |  |
| 49145 | 150912-25  | CUG  | ZK312-307 | 110.9 | 5.40 | -3.60 | 0.538 | 0.522 | 0.532 | 6 | 0.0166 | 0.007 | 73 | 3 |  |
| 49443 | 150927-35  | CUG  | ZK312-307 |       | 5.36 | -3.44 | 0.566 | 0.550 |       |   |        |       |    |   |  |
| 56828 | 160422-23  | CUG  | ZK312-307 |       | 5.09 | -3.32 | 0.525 | 0.521 |       |   |        |       |    |   |  |
|       | 201512     | UCLA | ZK312-307 |       | 5.45 | -3.09 |       | 0.541 |       |   |        |       |    |   |  |
| 59268 | 160601-F1  | CUG  | ZK312-307 |       | 5.06 | -3.42 | 0.541 | 0.538 |       |   |        |       |    |   |  |
| 49888 | 151011-35  | CUG  | ZK312-307 |       | 5.44 | -3.15 | 0.537 | 0.521 |       |   |        |       |    |   |  |
| 5370  | 20190217-4 | CUG  | ZK312-310 | 108.3 | 4.83 | -2.58 | 0.500 | 0.497 | 0.529 | 6 | 0.0188 | 0.008 | 75 | 4 |  |
| 5430  | 20190218-5 | CUG  | ZK312-310 |       | 4.79 | -2.50 | 0.513 | 0.512 |       |   |        |       |    |   |  |
| 5660  | 20190223-4 | CUG  | ZK312-310 |       | 4.91 | -2.47 | 0.534 | 0.534 |       |   |        |       |    |   |  |
| 56908 | 160422-25  | CUG  | ZK312-310 |       | 4.31 | -2.53 | 0.561 | 0.560 |       |   |        |       |    |   |  |
|       | 201512     | UCLA | ZK312-310 |       | 4.87 | -2.07 |       | 0.508 |       |   |        |       |    |   |  |
| 59157 | 160528-E3  | CUG  | ZK312-310 |       | 4.35 | -1.97 | 0.566 | 0.565 |       |   |        |       |    |   |  |

|       |           |      |           |       |      |       |       |       |       |   |        |       |    |   |
|-------|-----------|------|-----------|-------|------|-------|-------|-------|-------|---|--------|-------|----|---|
| 49155 | 150912-26 | CUG  | ZK312-313 | 104.0 | 3.95 | -4.90 | 0.566 | 0.549 | 0.540 | 2 | 0.0130 | 0.009 | 69 | 4 |
| 49476 | 150929-31 | CUG  | ZK312-313 |       | 3.88 | -4.08 | 0.547 | 0.531 |       |   |        |       |    |   |
| 49486 | 150929-32 | CUG  | ZK312-317 | 100.8 | 4.15 | -4.93 | 0.536 | 0.520 | 0.537 | 3 | 0.0317 | 0.018 | 71 | 8 |
| 57206 | 160503-33 | CUG  | ZK312-317 |       | 4.20 | -4.60 | 0.573 | 0.574 |       |   |        |       |    |   |
| 59167 | 160528-E4 | CUG  | ZK312-317 |       | 3.92 | -4.46 | 0.522 | 0.518 |       |   |        |       |    |   |
| 49165 | 150914-31 | CUG  | ZK312-321 | 98.6  | 4.84 | -3.24 | 0.534 | 0.518 | 0.540 | 4 | 0.0375 | 0.019 | 70 | 9 |
| 49496 | 150929-33 | CUG  | ZK312-321 |       | 4.85 | -2.98 | 0.534 | 0.518 |       |   |        |       |    |   |
|       | 201512    | UCLA | ZK312-321 |       | 4.89 | -2.90 |       | 0.528 |       |   |        |       |    |   |
| 60193 | 160614-G3 | CUG  | ZK312-321 |       | 4.56 | -2.56 | 0.593 | 0.595 |       |   |        |       |    |   |
| 57273 | 160503-35 | CUG  | ZK312-326 | 95.1  | 4.46 | -2.71 | 0.556 | 0.555 | 0.556 | 3 | 0.0083 | 0.005 | 62 | 2 |
|       | 201512    | UCLA | ZK312-326 |       | 4.91 | -2.35 |       | 0.548 |       |   |        |       |    |   |
| 58459 | 160520-C1 | CUG  | ZK312-326 |       | 4.45 | -2.24 | 0.565 | 0.565 |       |   |        |       |    |   |
| 49513 | 150929-34 | CUG  | ZK312-328 | 93.5  | 4.46 | -3.03 | 0.587 | 0.570 | 0.559 | 3 | 0.0118 | 0.007 | 61 | 3 |
|       | 201512    | UCLA | ZK312-328 |       | 4.76 | -2.54 |       | 0.547 |       |   |        |       |    |   |
| 59177 | 160528-E5 | CUG  | ZK312-328 |       | 4.20 | -2.59 | 0.562 | 0.561 |       |   |        |       |    |   |
| 49523 | 150929-35 | CUG  | ZK312-331 | 91.2  | 3.14 | -3.01 | 0.601 | 0.585 | 0.586 | 4 | 0.0163 | 0.008 | 50 | 3 |
| 58908 | 160522-D1 | CUG  | ZK312-331 |       | 2.81 | -2.45 | 0.595 | 0.597 |       |   |        |       |    |   |
|       | 201512    | UCLA | ZK312-331 |       | 3.29 | -2.70 |       | 0.563 |       |   |        |       |    |   |
| 58928 | 160522-D2 | CUG  | ZK312-331 |       | 2.80 | -2.76 | 0.596 | 0.598 |       |   |        |       |    |   |
| 49185 | 150914-33 | CUG  | ZK312-335 | 88.4  | 3.02 | -3.03 | 0.577 | 0.561 | 0.554 | 2 | 0.0102 | 0.007 | 63 | 3 |
| 49537 | 150930-36 | CUG  | ZK312-335 |       | 3.16 | -2.41 | 0.563 | 0.546 |       |   |        |       |    |   |
| 49195 | 150914-34 | CUG  | ZK312-339 | 86.4  | 4.08 | -4.50 | 0.552 | 0.536 | 0.528 | 3 | 0.0104 | 0.006 | 75 | 3 |
|       | 201512    | UCLA | ZK312-339 |       | 4.04 | -3.29 |       | 0.517 |       |   |        |       |    |   |
| 49547 | 151001-31 | CUG  | ZK312-339 |       | 3.90 | -3.46 | 0.548 | 0.532 |       |   |        |       |    |   |
| 59317 | 160602-F3 | CUG  | ZK312-346 | 82.9  | 2.12 | -2.94 | 0.584 | 0.585 | 0.570 | 4 | 0.0189 | 0.009 | 56 | 4 |

|       |            |      |           |      |      |       |       |       |       |   |        |       |    |   |
|-------|------------|------|-----------|------|------|-------|-------|-------|-------|---|--------|-------|----|---|
| 5305  | 20190216-3 | CUG  | ZK312-346 |      | 2.64 | -3.44 | 0.577 | 0.587 |       |   |        |       |    |   |
|       | 201512     | UCLA | ZK312-346 |      | 2.54 | -3.06 |       | 0.562 |       |   |        |       |    |   |
| 5410  | 20190218-3 | CUG  | ZK312-346 |      | 2.82 | -3.04 | 0.546 | 0.548 |       |   |        |       |    |   |
| 49205 | 150914-35  | CUG  | ZK312-351 | 80.3 | 0.97 | -3.32 | 0.536 | 0.520 | 0.540 | 5 | 0.0209 | 0.009 | 69 | 4 |
| 49557 | 151001-32  | CUG  | ZK312-351 |      | 1.06 | -3.22 | 0.586 | 0.570 |       |   |        |       |    |   |
| 59327 | 160602-F4  | CUG  | ZK312-351 |      | 0.82 | -3.47 | 0.537 | 0.534 |       |   |        |       |    |   |
|       | 201512     | UCLA | ZK312-351 |      | 1.15 | -2.71 |       | 0.553 |       |   |        |       |    |   |
| 49908 | 151012-31  | CUG  | ZK312-351 |      | 1.14 | -3.08 | 0.540 | 0.524 |       |   |        |       |    |   |
| 49572 | 151001-33  | CUG  | ZK312-356 | 76.6 | 3.57 | -4.62 | 0.551 | 0.535 | 0.523 | 5 | 0.0117 | 0.005 | 78 | 3 |
| 5390  | 20190218-1 | CUG  | ZK312-356 |      | 4.05 | -4.12 | 0.516 | 0.515 |       |   |        |       |    |   |
|       | 201512     | UCLA | ZK312-356 |      | 3.90 | -3.99 |       | 0.526 |       |   |        |       |    |   |
| 5460  | 20190219-3 | CUG  | ZK312-356 |      | 4.03 | -4.37 | 0.531 | 0.531 |       |   |        |       |    |   |
| 5720  | 20190225-1 | CUG  | ZK312-356 |      | 4.24 | -3.91 | 0.509 | 0.507 |       |   |        |       |    |   |
| 49215 | 150914-36  | CUG  | ZK312-361 | 73.3 | 3.24 | -3.79 | 0.570 | 0.554 | 0.556 | 2 | 0.0018 | 0.001 | 62 | 1 |
| 49580 | 151001-34  | CUG  | ZK312-361 |      | 4.33 | -3.58 | 0.573 | 0.557 |       |   |        |       |    |   |
| 49590 | 151001-35  | CUG  | ZK312-364 | 71.6 | 3.20 | -4.44 | 0.561 | 0.545 | 0.536 | 4 | 0.0157 | 0.008 | 71 | 4 |
| 58938 | 160522-D3  | CUG  | ZK312-364 |      | 2.56 | -3.50 | 0.549 | 0.547 |       |   |        |       |    |   |
|       | 201512     | UCLA | ZK312-364 |      | 3.13 | -3.73 |       | 0.513 |       |   |        |       |    |   |
| 59187 | 160528-E7  | CUG  | ZK312-364 |      | 2.83 | -2.48 | 0.542 | 0.540 |       |   |        |       |    |   |
| 49278 | 150916-32  | CUG  | ZK312-368 | 67.9 | 2.82 | -4.71 | 0.581 | 0.565 | 0.533 | 4 | 0.0361 | 0.018 | 73 | 8 |
| 49598 | 151001-36  | CUG  | ZK312-368 |      | 2.93 | -3.95 | 0.577 | 0.561 |       |   |        |       |    |   |
| 60243 | 160614-G5  | CUG  | ZK312-368 |      | 2.94 | -3.87 | 0.519 | 0.514 |       |   |        |       |    |   |
| 49918 | 151012-32  | CUG  | ZK312-368 |      | 2.97 | -4.29 | 0.507 | 0.491 |       |   |        |       |    |   |
|       | 201512     | UCLA | ZK312-376 | 63.9 | 3.36 | -3.26 |       | 0.520 | 0.520 | 1 |        |       | 79 |   |
| 49225 | 150916-22  | CUG  | ZK312-384 | 58.9 | 3.58 | -6.15 | 0.573 | 0.557 | 0.522 | 4 | 0.0262 | 0.013 | 78 | 7 |



|       |            |      |           |      |       |       |       |       |       |   |        |       |    |    |
|-------|------------|------|-----------|------|-------|-------|-------|-------|-------|---|--------|-------|----|----|
| 49618 | 151004-32  | CUG  | ZK312-384 |      | 3.43  | -6.78 | 0.509 | 0.493 |       |   |        |       |    |    |
|       | 201512     | UCLA | ZK312-384 |      | 3.69  | -6.03 |       | 0.518 |       |   |        |       |    |    |
| 49938 | 151012-33  | CUG  | ZK312-384 |      | 3.55  | -6.12 | 0.535 | 0.519 |       |   |        |       |    |    |
| 49235 | 150916-23  | CUG  | P312-8    | 53.0 | 1.32  | -4.41 | 0.555 | 0.539 | 0.529 | 2 | 0.0139 | 0.010 | 75 | 5  |
| 49645 | 151004-35  | CUG  | P312-8    |      | 0.09  | -4.95 | 0.535 | 0.519 |       |   |        |       |    |    |
| 49655 | 151004-36  | CUG  | P312-14   | 50.0 | 0.34  | -4.87 | 0.541 | 0.525 | 0.520 | 4 | 0.0317 | 0.016 | 80 | 8  |
| 59050 | 160522-D7  | CUG  | P312-14   |      | 0.30  | -3.98 | 0.557 | 0.556 |       |   |        |       |    |    |
| 59379 | 160602-F6  | CUG  | P312-14   |      | 0.18  | -4.11 | 0.523 | 0.518 |       |   |        |       |    |    |
|       | 201512     | UCLA | P312-14   |      | 0.42  | -4.90 |       | 0.479 |       |   |        |       |    |    |
| 49665 | 151005-31  | CUG  | P312-20   | 47.0 | -0.44 | -4.61 | 0.587 | 0.571 | 0.519 | 9 | 0.0246 | 0.008 | 80 | 4  |
| 49810 | 151009-34  | CUG  | P312-20   |      | -0.45 | -4.53 | 0.514 | 0.498 |       |   |        |       |    |    |
| 58479 | 160520-C3  | CUG  | P312-20   |      | -0.68 | -4.40 | 0.515 | 0.510 |       |   |        |       |    |    |
| 59237 | 160528-E8  | CUG  | P312-20   |      | -0.74 | -4.55 | 0.509 | 0.504 |       |   |        |       |    |    |
| 59337 | 160602-F5  | CUG  | P312-20   |      | -0.73 | -4.33 | 0.525 | 0.521 |       |   |        |       |    |    |
| 49948 | 151012-34  | CUG  | P312-20   |      | -0.50 | -4.53 | 0.547 | 0.531 |       |   |        |       |    |    |
| 59247 | 160528-E9  | CUG  | P312-20   |      | -0.83 | -4.82 | 0.511 | 0.505 |       |   |        |       |    |    |
| 49965 | 151012-35  | CUG  | P312-20   |      | -0.46 | -4.37 | 0.509 | 0.493 |       |   |        |       |    |    |
|       | 201512     | UCLA | P312-20   |      | -0.38 | -4.34 |       | 0.538 |       |   |        |       |    |    |
| 49683 | 151005-32  | CUG  | P312-26   | 44.0 | -4.69 | -5.27 | 0.527 | 0.511 | 0.520 | 4 | 0.0537 | 0.027 | 80 | 13 |
| 60253 | 160614-G6  | CUG  | P312-26   |      | -0.08 | -4.80 | 0.470 | 0.461 |       |   |        |       |    |    |
| 60352 | 160616-A1  | CUG  | P312-26   |      | -5.11 | -6.09 | 0.590 | 0.591 |       |   |        |       |    |    |
|       | 201512     | UCLA | P312-26   |      | -4.58 | -5.20 |       | 0.515 |       |   |        |       |    |    |
| 49248 | 150916-24  | CUG  | P312-32   | 40.0 | -0.69 | -5.78 | 0.521 | 0.505 | 0.523 | 4 | 0.0285 | 0.014 | 78 | 7  |
| 49693 | 151005-33  | CUG  | P312-32   |      | -0.76 | -5.56 | 0.515 | 0.499 |       |   |        |       |    |    |
| 59257 | 160528-E10 | CUG  | P312-32   |      | -0.98 | -5.38 | 0.563 | 0.562 |       |   |        |       |    |    |

|       |           |      |          |      |       |       |       |       |       |   |        |       |     |    |
|-------|-----------|------|----------|------|-------|-------|-------|-------|-------|---|--------|-------|-----|----|
|       | 201512    | UCLA | P312-32  |      | -0.71 | -5.44 |       | 0.526 |       |   |        |       |     |    |
| 49703 | 151005-34 | CUG  | P312-37  | 38.0 | 0.04  | -6.11 | 0.531 | 0.515 | 0.511 | 2 | 0.0065 | 0.005 | 84  | 2  |
|       | 201512    | UCLA | P312-37  |      | 0.19  | -5.95 |       | 0.506 |       |   |        |       |     |    |
| 49258 | 150916-25 | CUG  | P312-46  | 32.1 | 4.08  | -5.67 | 0.528 | 0.512 | 0.516 | 5 | 0.0123 | 0.005 | 82  | 3  |
| 49713 | 151005-35 | CUG  | P312-46  |      | 4.48  | -4.55 | 0.532 | 0.516 |       |   |        |       |     |    |
| 58968 | 160522-D5 | CUG  | P312-46  |      | 4.16  | -4.30 | 0.505 | 0.499 |       |   |        |       |     |    |
| 59040 | 160522-D6 | CUG  | P312-46  |      | 4.09  | -5.61 | 0.536 | 0.533 |       |   |        |       |     |    |
| 60233 | 160614-G4 | CUG  | P312-46  |      | 4.05  | -5.54 | 0.523 | 0.518 |       |   |        |       |     |    |
|       | 201512    | UCLA | P312-53  | 29.0 | 4.76  | -5.94 |       | 0.502 | 0.502 | 1 |        |       | 89  |    |
| 49730 | 151005-36 | CUG  | P312-55  | 28.0 | 4.00  | -6.84 | 0.461 | 0.445 | 0.445 | 1 |        |       | 125 |    |
| 49820 | 151009-35 | CUG  | P312-58  | 26.0 | 4.45  | -6.64 | 0.515 | 0.498 | 0.499 | 2 | 0.0008 | 0.001 | 91  | 0  |
| 49975 | 151012-36 | CUG  | P312-58  |      | 4.33  | -6.57 | 0.516 | 0.500 |       |   |        |       |     |    |
| 49740 | 151007-31 | CUG  | P312-60  | 25.0 | 4.68  | -6.39 | 0.491 | 0.475 | 0.475 | 1 |        |       | 105 |    |
| 49750 | 151007-32 | CUG  | P312-66  | 22.0 | 4.72  | -7.00 | 0.425 | 0.409 | 0.409 | 1 |        |       | 155 |    |
|       | 201512    | UCLA | P312-67  | 21.0 | 4.78  | -6.79 |       | 0.450 | 0.450 | 1 |        |       | 122 |    |
| 49268 | 150916-26 | CUG  | P312-68  | 20.5 | 4.97  | -7.28 | 0.533 | 0.516 | 0.516 | 1 |        |       | 81  |    |
| 49765 | 151007-33 | CUG  | P312-70  | 20.0 | 4.63  | -6.94 | 0.491 | 0.475 | 0.475 | 1 |        |       | 105 |    |
| 49785 | 151009-32 | CUG  | P312-105 | 2.5  | 1.93  | -4.04 | 0.565 | 0.549 | 0.530 | 3 | 0.0369 | 0.021 | 74  | 10 |
| 7894  | 170325-5  | UCLA | P312-105 |      | 1.27  | -4.65 | 0.504 | 0.488 |       |   |        |       |     |    |
| 49830 | 151009-36 | CUG  | P312-105 |      | 1.47  | -4.08 | 0.570 | 0.554 |       |   |        |       |     |    |
| 49288 | 150916-31 | CUG  | P312-114 | 0.7  | 0.02  | -7.06 | 0.523 | 0.507 | 0.492 | 4 | 0.0395 | 0.020 | 94  | 11 |
| 49800 | 151009-33 | CUG  | P312-114 |      | -0.13 | -6.94 | 0.529 | 0.513 |       |   |        |       |     |    |
| 7707  | 170321-4  | CUG  | P312-114 |      | -0.63 | -7.55 | 0.452 | 0.433 |       |   |        |       |     |    |
|       | 201512    | UCLA | P312-114 |      | 0.18  | -6.73 |       | 0.516 |       |   |        |       |     |    |

---

**ZK407 section**

---

|       |          |     |           |       |       |       |       |       |       |   |        |       |     |    |
|-------|----------|-----|-----------|-------|-------|-------|-------|-------|-------|---|--------|-------|-----|----|
| 9244  | 170418-3 | CUG | ZK407-270 | 132.4 | 6.14  | -4.80 | 0.497 | 0.480 | 0.485 | 3 | 0.0243 | 0.014 | 99  | 8  |
| 9504  | 170422-6 | CUG | ZK407-270 |       | 6.03  | -5.12 | 0.481 | 0.463 |       |   |        |       |     |    |
| 9524  | 170423-2 | CUG | ZK407-270 |       | 5.89  | -5.42 | 0.526 | 0.511 |       |   |        |       |     |    |
| 9294  | 170419-6 | CUG | ZK407-290 | 119.3 | 4.88  | -5.70 | 0.466 | 0.448 | 0.473 | 4 | 0.0520 | 0.026 | 106 | 16 |
| 9494  | 170422-5 | CUG | ZK407-290 |       | 4.80  | -6.06 | 0.452 | 0.433 |       |   |        |       |     |    |
| 11232 | 170601-4 | CUG | ZK407-290 |       | 4.88  | -5.64 | 0.561 | 0.549 |       |   |        |       |     |    |
| 11302 | 170603-2 | CUG | ZK407-290 |       | 5.02  | -5.96 | 0.479 | 0.461 |       |   |        |       |     |    |
| 10872 | 170525-2 | CUG | ZK407-296 | 115.8 | 1.72  | -6.19 | 0.510 | 0.495 | 0.486 | 3 | 0.0233 | 0.013 | 98  | 8  |
| 10962 | 170526-5 | CUG | ZK407-296 |       | 3.26  | -6.08 | 0.477 | 0.459 |       |   |        |       |     |    |
| 11122 | 170529-3 | CUG | ZK407-296 |       | 3.32  | -5.79 | 0.518 | 0.503 |       |   |        |       |     |    |
| 10882 | 170525-3 | CUG | ZK407-310 | 106.8 | 0.93  | -4.80 | 0.607 | 0.597 | 0.557 | 4 | 0.0294 | 0.015 | 62  | 6  |
| 10972 | 170527-1 | CUG | ZK407-310 |       | 1.57  | -4.64 | 0.559 | 0.546 |       |   |        |       |     |    |
| 11132 | 170529-4 | CUG | ZK407-310 |       | 1.54  | -4.71 | 0.542 | 0.528 |       |   |        |       |     |    |
| 11212 | 170601-2 | CUG | ZK407-310 |       | 1.45  | -4.98 | 0.569 | 0.556 |       |   |        |       |     |    |
| 9224  | 170418-1 | CUG | ZK407-317 | 102.3 | -0.49 | -5.15 | 0.562 | 0.549 | 0.516 | 4 | 0.0446 | 0.022 | 82  | 11 |
| 9484  | 170422-4 | CUG | ZK407-317 |       | -0.33 | -4.97 | 0.504 | 0.488 |       |   |        |       |     |    |
| 9594  | 170424-6 | CUG | ZK407-317 |       | -0.09 | -4.23 | 0.485 | 0.468 |       |   |        |       |     |    |
| 11192 | 170530-5 | CUG | ZK407-317 |       | -0.26 | -5.02 | 0.570 | 0.558 |       |   |        |       |     |    |
| 10902 | 170525-5 | CUG | ZK407-320 | 100.1 | -0.07 | -4.38 | 0.511 | 0.496 | 0.547 | 4 | 0.0373 | 0.019 | 66  | 8  |
| 10982 | 170527-2 | CUG | ZK407-320 |       | -0.02 | -4.42 | 0.559 | 0.547 |       |   |        |       |     |    |
| 11152 | 170530-1 | CUG | ZK407-320 |       | -0.09 | -4.42 | 0.593 | 0.582 |       |   |        |       |     |    |
| 11242 | 170601-5 | CUG | ZK407-320 |       | -0.07 | -4.22 | 0.577 | 0.565 |       |   |        |       |     |    |
| 9234  | 170418-2 | CUG | ZK407-327 | 95.9  | 0.75  | -3.58 | 0.516 | 0.500 | 0.533 | 4 | 0.0254 | 0.013 | 73  | 6  |
| 9474  | 170422-3 | CUG | ZK407-327 |       | 0.65  | -4.00 | 0.545 | 0.531 |       |   |        |       |     |    |
| 9544  | 170424-1 | CUG | ZK407-327 |       | 0.74  | -4.03 | 0.553 | 0.540 |       |   |        |       |     |    |



|       |            |     |            |      |       |       |       |       |       |   |        |       |     |    |  |
|-------|------------|-----|------------|------|-------|-------|-------|-------|-------|---|--------|-------|-----|----|--|
| 11222 | 170601-3   | CUG | ZK407-327  |      | 0.78  | -3.85 | 0.574 | 0.562 |       |   |        |       |     |    |  |
| 7055  | 20180303-2 | CUG | ZK407-337  | 89.4 | -0.49 | -3.75 | 0.479 | 0.487 | 0.524 | 4 | 0.0251 | 0.013 | 77  | 6  |  |
| 8465  | 20180401-5 | CUG | ZK407-337  |      | -0.32 | -3.50 | 0.526 | 0.533 |       |   |        |       |     |    |  |
| 9698  | 20180428-3 | CUG | ZK407-337  |      | -0.39 | -3.71 | 0.537 | 0.544 |       |   |        |       |     |    |  |
| 9848  | 20180501-4 | CUG | ZK407-337  |      | -0.41 | -3.74 | 0.524 | 0.532 |       |   |        |       |     |    |  |
| 9254  | 170419-2   | CUG | ZK407-351  | 81.2 | -4.46 | -3.62 | 0.497 | 0.481 | 0.481 | 2 | 0.0143 | 0.010 | 101 | 6  |  |
| 9454  | 170422-1   | CUG | ZK407-351  |      | -4.63 | -4.13 | 0.498 | 0.482 |       |   |        |       |     |    |  |
| 9284  | 170419-5   | CUG | ZK407-360  | 73.8 | 0.88  | -5.06 | 0.521 | 0.506 | 0.509 | 2 | 0.0244 | 0.017 | 85  | 9  |  |
| 9444  | 170421-6   | CUG | ZK407-360  |      | 0.69  | -5.64 | 0.526 | 0.511 |       |   |        |       |     |    |  |
| 9274  | 170419-4   | CUG | ZK407-398  | 57.8 | 1.51  | -4.70 | 0.563 | 0.551 | 0.517 | 3 | 0.0290 | 0.017 | 81  | 8  |  |
| 9434  | 170421-5   | CUG | ZK407-398  |      | 1.39  | -5.06 | 0.514 | 0.498 |       |   |        |       |     |    |  |
| 9554  | 170424-2   | CUG | ZK407-398  |      | 1.43  | -5.15 | 0.518 | 0.503 |       |   |        |       |     |    |  |
| 9304  | 170419-7   | CUG | ZK407-412P | 50.4 | 0.70  | -4.87 | 0.500 | 0.484 | 0.512 | 3 | 0.0247 | 0.014 | 84  | 7  |  |
| 9424  | 170421-4   | CUG | ZK407-412P |      | 0.58  | -5.42 | 0.544 | 0.530 |       |   |        |       |     |    |  |
| 9564  | 170424-3   | CUG | ZK407-412p |      | 0.51  | -5.68 | 0.535 | 0.521 |       |   |        |       |     |    |  |
| 10912 | 170525-6   | CUG | ZK407-416  | 46.1 | -1.20 | -5.22 | 0.604 | 0.593 | 0.573 | 4 | 0.0213 | 0.011 | 55  | 4  |  |
| 11082 | 170528-4   | CUG | ZK407-416  |      | -1.22 | -4.98 | 0.581 | 0.569 |       |   |        |       |     |    |  |
| 11162 | 170530-2   | CUG | ZK407-416  |      | -1.22 | -5.16 | 0.558 | 0.545 |       |   |        |       |     |    |  |
| 11272 | 170602-3   | CUG | ZK407-416  |      | -1.16 | -4.75 | 0.596 | 0.585 |       |   |        |       |     |    |  |
| 10922 | 170526-1   | CUG | ZK407-424  | 35.4 | -7.48 | -4.33 | 0.533 | 0.518 | 0.552 | 4 | 0.0289 | 0.014 | 64  | 6  |  |
| 11102 | 170529-1   | CUG | ZK407-424  |      | -7.44 | -4.52 | 0.556 | 0.543 |       |   |        |       |     |    |  |
| 11172 | 170530-3   | CUG | ZK407-424  |      | -7.57 | -4.26 | 0.598 | 0.587 |       |   |        |       |     |    |  |
| 11252 | 170602-1   | CUG | ZK407-424  |      | -7.61 | -4.31 | 0.571 | 0.558 |       |   |        |       |     |    |  |
| 10932 | 170526-2   | CUG | ZK407-428  | 31.1 | -1.23 | -6.28 | 0.449 | 0.430 | 0.465 | 3 | 0.0307 | 0.018 | 111 | 11 |  |
| 11112 | 170529-2   | CUG | ZK407-428  |      | -1.31 | -6.49 | 0.498 | 0.482 |       |   |        |       |     |    |  |

|       |          |     |           |       |       |       |       |
|-------|----------|-----|-----------|-------|-------|-------|-------|
| 11182 | 170530-4 | CUG | ZK407-428 | -1.22 | -6.46 | 0.500 | 0.484 |
|-------|----------|-----|-----------|-------|-------|-------|-------|

---

<sup>a</sup> In order to simplify the description, we use  $\Delta_{47}$  to replace the STF- $\Delta_{47ARF25}$  (more details see Table S3).

<sup>b</sup> Standard deviations (s.d.) correspond to duplicate analyses.

<sup>c</sup> Standard error (s.e.) was given by  $s.d./n^{0.5}$ .

**Table S3. Raw data,  $\Delta_{47}$  values and other related values of absolute reference frame (ARF) and the standards in this study.**

| Analysis-# | Date      | Sample ID                                | raw $\delta_{45}$<br>(‰WG <sup>a</sup> ) | raw $\delta_{46}$<br>(‰WG <sup>a</sup> ) | raw $\delta_{47}$<br>(‰WG <sup>a</sup> ) | raw $\delta_{48}$<br>(‰WG <sup>a</sup> ) | raw $\delta_{49}$<br>(‰WG <sup>a</sup> ) | Brand raw $\Delta_{47}$<br>(‰) <sup>b</sup> | Brand raw $\Delta_{48}$<br>(‰) <sup>b</sup> | Brand raw $\Delta_{49}$<br>(‰) <sup>b</sup> | Slope <sub>EGL</sub> <sup>c</sup> | Slope <sub>ETF</sub> <sup>d</sup> | Intercept <sub>ETF</sub> <sup>d</sup> | $\Delta_{47\text{ARF25}}$ (‰) <sup>e</sup> | Average $\Delta_{47\text{ARF25}}$<br>(‰) | Expected $\Delta_{47\text{ARF25}}$<br>(‰) <sup>f</sup> | $\Delta_{47}$<br>(STF- $\Delta_{47\text{ARF25}}$ )<br>(‰) <sup>g</sup> |
|------------|-----------|------------------------------------------|------------------------------------------|------------------------------------------|------------------------------------------|------------------------------------------|------------------------------------------|---------------------------------------------|---------------------------------------------|---------------------------------------------|-----------------------------------|-----------------------------------|---------------------------------------|--------------------------------------------|------------------------------------------|--------------------------------------------------------|------------------------------------------------------------------------|
| 48910      | 150830-32 | Equilibrated CO <sub>2</sub><br>at 10 °C | -0.447                                   | -12.074                                  | -12.318                                  | -27.740                                  | 6.083                                    | 0.009                                       | -3.829                                      | 30.877                                      | 0.003                             | 1.139                             | 0.915                                 |                                            |                                          |                                                        |                                                                        |
| 48900      | 150830-31 | Equilibrated CO <sub>2</sub><br>at 10 °C | -0.351                                   | -12.165                                  | -12.288                                  | -27.801                                  | 4.995                                    | 0.030                                       | -3.709                                      | 29.842                                      | 0.003                             | 1.139                             | 0.915                                 |                                            |                                          |                                                        |                                                                        |
| 48920      | 150830-33 | Equilibrated CO <sub>2</sub><br>at 10 °C | 0.186                                    | 4.244                                    | 4.434                                    | 9.801                                    | 4.853                                    | 0.068                                       | 1.283                                       | -3.672                                      | 0.003                             | 1.139                             | 0.915                                 |                                            |                                          |                                                        |                                                                        |
| 48732      | 150824-31 | Equilibrated CO <sub>2</sub><br>at 10 °C | 17.851                                   | -12.349                                  | 6.152                                    | -27.864                                  | 2.724                                    | 0.100                                       | -3.401                                      | 8.325                                       | 0.003                             | 1.139                             | 0.915                                 |                                            |                                          |                                                        |                                                                        |
| 48442      | 150815-31 | Equilibrated CO <sub>2</sub><br>at 10 °C | 17.795                                   | -11.804                                  | 6.617                                    | -26.568                                  | 4.692                                    | 0.075                                       | -3.173                                      | 9.267                                       | 0.003                             | 1.139                             | 0.915                                 |                                            |                                          |                                                        |                                                                        |
| 48452      | 150815-32 | Equilibrated CO <sub>2</sub><br>at 10 °C | 18.137                                   | -3.267                                   | 15.504                                   | -7.252                                   | 4.265                                    | 0.060                                       | -0.733                                      | -8.431                                      | 0.003                             | 1.139                             | 0.915                                 |                                            |                                          |                                                        |                                                                        |
| 48742      | 150824-32 | Equilibrated CO <sub>2</sub><br>at 10 °C | 18.175                                   | -3.211                                   | 15.674                                   | -7.097                                   | 3.226                                    | 0.133                                       | -0.690                                      | -9.606                                      | 0.003                             | 1.139                             | 0.915                                 |                                            |                                          |                                                        |                                                                        |
| 48467      | 150815-33 | Equilibrated CO <sub>2</sub><br>at 10 °C | 18.126                                   | -1.182                                   | 17.658                                   | -2.043                                   | 2.611                                    | 0.135                                       | 0.321                                       | -14.109                                     | 0.003                             | 1.139                             | 0.915                                 |                                            |                                          |                                                        |                                                                        |
| 48755      | 150824-33 | Equilibrated CO <sub>2</sub><br>at 10 °C | 18.271                                   | -0.717                                   | 18.222                                   | -1.426                                   | 2.862                                    | 0.085                                       | 0.008                                       | -14.914                                     | 0.003                             | 1.139                             | 0.915                                 |                                            |                                          |                                                        |                                                                        |

|       |           |                                          |        |         |         |         |        |        |        |         |       |       |       |
|-------|-----------|------------------------------------------|--------|---------|---------|---------|--------|--------|--------|---------|-------|-------|-------|
| 48477 | 150815-34 | Equilibrated CO <sub>2</sub><br>at 10 °C | 18.440 | 4.198   | 23.358  | 9.808   | 3.588  | 0.121  | 1.383  | -23.834 | 0.003 | 1.139 | 0.915 |
| 48765 | 150824-34 | Equilibrated CO <sub>2</sub><br>at 10 °C | 18.540 | 4.606   | 23.905  | 10.864  | 3.420  | 0.153  | 1.615  | -24.880 | 0.003 | 1.139 | 0.915 |
| 48193 | 150802-11 | Equilibrated CO <sub>2</sub><br>at 25 °C | -0.552 | -14.900 | -15.255 | -33.317 | 5.683  | -0.045 | -3.852 | 36.400  | 0.003 | 1.139 | 0.915 |
| 48203 | 150802-12 | Equilibrated CO <sub>2</sub><br>at 25 °C | -0.491 | -14.561 | -14.862 | -32.432 | 6.104  | -0.047 | -3.626 | 36.066  | 0.003 | 1.139 | 0.915 |
| 48213 | 150802-13 | Equilibrated CO <sub>2</sub><br>at 25 °C | -0.481 | -14.741 | -15.022 | -32.762 | 6.581  | -0.040 | -3.602 | 36.918  | 0.003 | 1.139 | 0.915 |
| 48222 | 150802-14 | Equilibrated CO <sub>2</sub><br>at 25 °C | -0.181 | -5.588  | -5.697  | -12.198 | 1.065  | -0.018 | -1.064 | 12.343  | 0.003 | 1.139 | 0.915 |
| 48232 | 150802-15 | Equilibrated CO <sub>2</sub><br>at 25 °C | -0.116 | -5.520  | -5.597  | -12.267 | 3.868  | -0.051 | -1.271 | 14.972  | 0.003 | 1.139 | 0.915 |
| 48242 | 150802-16 | Equilibrated CO <sub>2</sub><br>at 25 °C | -0.224 | -5.604  | -5.763  | -12.384 | 6.145  | -0.024 | -1.221 | 17.559  | 0.003 | 1.139 | 0.915 |
| 48252 | 150806-21 | Equilibrated CO <sub>2</sub><br>at 25 °C | -0.053 | -2.819  | -2.837  | -6.300  | -0.581 | -0.011 | -0.673 | 5.035   | 0.003 | 1.139 | 0.915 |
| 48262 | 150806-24 | Equilibrated CO <sub>2</sub><br>at 25 °C | 0.180  | 1.934   | 2.085   | 4.436   | 4.239  | -0.002 | 0.562  | 0.242   | 0.003 | 1.139 | 0.915 |
| 48327 | 150811-31 | Equilibrated CO <sub>2</sub><br>at 25 °C | 17.650 | -15.108 | 3.107   | -33.851 | 2.854  | 0.024  | -3.982 | 14.229  | 0.003 | 1.139 | 0.915 |
| 48337 | 150811-32 | Equilibrated CO <sub>2</sub><br>at 25 °C | 18.048 | -5.671  | 12.997  | -12.891 | 4.065  | 0.053  | -1.600 | -3.819  | 0.003 | 1.139 | 0.915 |
| 48347 | 150811-33 | Equilibrated CO <sub>2</sub>             | 18.197 | -2.890  | 15.891  | -6.303  | 2.957  | 0.008  | -0.533 | -10.519 | 0.003 | 1.139 | 0.915 |



|       |           |                                          |        |         |         |         |       |        |        |         |       |       |       |
|-------|-----------|------------------------------------------|--------|---------|---------|---------|-------|--------|--------|---------|-------|-------|-------|
|       |           | at 25 °C                                 |        |         |         |         |       |        |        |         |       |       |       |
| 48357 | 150811-34 | Equilibrated CO <sub>2</sub><br>at 25 °C | 18.340 | 1.736   | 20.752  | 4.087   | 3.582 | 0.085  | 0.609  | -19.018 | 0.003 | 1.139 | 0.915 |
| 48586 | 150819-31 | Equilibrated CO <sub>2</sub><br>at 25 °C | 17.685 | -14.792 | 3.456   | -33.435 | 4.116 | 0.021  | -4.192 | 14.829  | 0.003 | 1.139 | 0.915 |
| 48596 | 150819-32 | Equilibrated CO <sub>2</sub><br>at 25 °C | 18.020 | -5.717  | 12.920  | -13.111 | 5.119 | 0.051  | -1.728 | -2.653  | 0.003 | 1.139 | 0.915 |
| 48616 | 150819-33 | Equilibrated CO <sub>2</sub><br>at 25 °C | 18.114 | -3.031  | 15.711  | -6.855  | 4.814 | 0.055  | -0.806 | -8.325  | 0.003 | 1.139 | 0.915 |
| 48606 | 150819-34 | Equilibrated CO <sub>2</sub><br>at 25 °C | 18.358 | 1.822   | 20.849  | 4.390   | 4.168 | 0.078  | 0.740  | -18.629 | 0.003 | 1.139 | 0.915 |
| 48712 | 150824-14 | Equilibrated CO <sub>2</sub><br>at 50 °C | 29.853 | -13.593 | 17.028  | -30.887 | 5.283 | 0.006  | -3.994 | 0.843   | 0.003 | 1.139 | 0.915 |
| 48407 | 150814-12 | Equilibrated CO <sub>2</sub><br>at 50 °C | 17.696 | -16.651 | 1.536   | -37.691 | 3.641 | -0.048 | -4.824 | 18.110  | 0.003 | 1.139 | 0.915 |
| 48417 | 150814-13 | Equilibrated CO <sub>2</sub><br>at 50 °C | 17.675 | -15.663 | 2.501   | -35.207 | 5.169 | -0.051 | -4.258 | 17.671  | 0.003 | 1.139 | 0.915 |
| 48427 | 150814-14 | Equilibrated CO <sub>2</sub><br>at 50 °C | 17.818 | -12.756 | 5.566   | -28.832 | 5.451 | -0.044 | -3.573 | 11.921  | 0.003 | 1.139 | 0.915 |
| 48541 | 150819-11 | Equilibrated CO <sub>2</sub><br>at 50 °C | 17.247 | -28.181 | -10.479 | -63.150 | 3.414 | -0.062 | -8.028 | 42.245  | 0.003 | 1.139 | 0.915 |
| 48551 | 150819-12 | Equilibrated CO <sub>2</sub><br>at 50 °C | 17.648 | -16.551 | 1.584   | -37.410 | 6.814 | -0.051 | -4.738 | 21.174  | 0.003 | 1.139 | 0.915 |
| 48561 | 150819-13 | Equilibrated CO <sub>2</sub><br>at 50 °C | 17.740 | -13.150 | 5.091   | -29.692 | 7.289 | -0.045 | -3.661 | 14.649  | 0.003 | 1.139 | 0.915 |

|       |           |                                          |        |         |         |         |       |        |        |        |       |       |       |
|-------|-----------|------------------------------------------|--------|---------|---------|---------|-------|--------|--------|--------|-------|-------|-------|
| 48571 | 150819-14 | Equilibrated CO <sub>2</sub><br>at 50 °C | 17.826 | -13.069 | 5.251   | -29.638 | 7.153 | -0.054 | -3.769 | 14.256 | 0.003 | 1.139 | 0.915 |
| 48692 | 150824-11 | Equilibrated CO <sub>2</sub><br>at 50 °C | 17.249 | -28.888 | -11.213 | -64.974 | 4.703 | -0.090 | -8.517 | 45.077 | 0.003 | 1.139 | 0.915 |
| 48702 | 150824-13 | Equilibrated CO <sub>2</sub><br>at 50 °C | 29.937 | -12.632 | 18.061  | -28.561 | 3.945 | -0.020 | -3.545 | -2.487 | 0.003 | 1.139 | 0.915 |
| 48722 | 150824-13 | Equilibrated CO <sub>2</sub><br>at 50 °C | 17.244 | -28.148 | -10.461 | -63.591 | 6.748 | -0.073 | -8.562 | 45.643 | 0.003 | 1.139 | 0.915 |
| 48833 | 150830-11 | Equilibrated CO <sub>2</sub><br>at 50 °C | -1.100 | -28.028 | -28.824 | -63.470 | 5.704 | -0.163 | -8.679 | 64.732 | 0.003 | 1.139 | 0.915 |
| 48843 | 150830-12 | Equilibrated CO <sub>2</sub><br>at 50 °C | -1.071 | -26.644 | -27.422 | -60.504 | 6.770 | -0.150 | -8.366 | 62.850 | 0.003 | 1.139 | 0.915 |
| 48853 | 150830-13 | Equilibrated CO <sub>2</sub><br>at 50 °C | -0.392 | -8.765  | -9.085  | -20.096 | 5.924 | -0.067 | -2.689 | 23.904 | 0.003 | 1.139 | 0.915 |
| 48866 | 150830-14 | Equilibrated CO <sub>2</sub><br>at 50 °C | -0.386 | -10.541 | -10.874 | -24.079 | 5.476 | -0.118 | -3.174 | 27.054 | 0.003 | 1.139 | 0.915 |
| 48083 | 150801-11 | Heated CO <sub>2</sub> at<br>1000 °C     | 18.124 | -4.719  | 13.181  | -10.182 | 0.543 | -0.784 | -0.774 | -9.258 | 0.003 | 1.139 | 0.915 |
| 48093 | 150801-12 | Heated CO <sub>2</sub> at<br>1000 °C     | 18.139 | -4.557  | 13.418  | -10.312 | 2.626 | -0.725 | -1.229 | -7.528 | 0.003 | 1.139 | 0.915 |
| 48118 | 150801-14 | Heated CO <sub>2</sub> at<br>1000 °C     | 18.093 | -4.540  | 13.364  | -10.053 | 1.013 | -0.748 | -1.003 | -9.110 | 0.003 | 1.139 | 0.915 |
| 48103 | 150801-13 | Heated CO <sub>2</sub> at<br>1000 °C     | 22.000 | -19.490 | 2.332   | -42.678 | 2.450 | -0.760 | -4.241 | 18.116 | 0.003 | 1.139 | 0.915 |
| 48128 | 150801-15 | Heated CO <sub>2</sub> at                | 22.113 | -18.964 | 2.969   | -41.742 | 3.746 | -0.767 | -4.336 | 18.236 | 0.003 | 1.139 | 0.915 |

|       |             |                                      |        |         |         |         |       |        |        |        |       |       |       |
|-------|-------------|--------------------------------------|--------|---------|---------|---------|-------|--------|--------|--------|-------|-------|-------|
|       |             | 1000 °C                              |        |         |         |         |       |        |        |        |       |       |       |
| 48146 | 150801-16   | Heated CO <sub>2</sub> at<br>1000 °C | 21.994 | -19.352 | 2.475   | -42.679 | 1.453 | -0.751 | -4.524 | 16.826 | 0.003 | 1.139 | 0.915 |
| 48156 | 150801-17   | Heated CO <sub>2</sub> at<br>1000 °C | -0.103 | -1.669  | -2.575  | -3.727  | 4.862 | -0.829 | -0.392 | 8.277  | 0.003 | 1.139 | 0.915 |
| 48166 | 150801-18   | Heated CO <sub>2</sub> at<br>1000 °C | -0.086 | -1.724  | -2.563  | -4.151  | 5.046 | -0.781 | -0.707 | 8.552  | 0.003 | 1.139 | 0.915 |
| 48276 | 150802-11-R | Heated CO <sub>2</sub> at<br>1000 °C | -0.681 | -15.911 | -17.156 | -35.826 | 5.492 | -0.834 | -4.396 | 38.438 | 0.003 | 1.139 | 0.915 |
| 48286 | 150802-15-R | Heated CO <sub>2</sub> at<br>1000 °C | -0.310 | -8.140  | -9.143  | -18.423 | 4.999 | -0.831 | -2.246 | 21.606 | 0.003 | 1.139 | 0.915 |
| 48301 | 150802-23-R | Heated CO <sub>2</sub> at<br>1000 °C | -0.211 | -7.034  | -7.924  | -16.208 | 5.356 | -0.798 | -2.221 | 19.626 | 0.003 | 1.139 | 0.915 |
| 48311 | 150802-26-R | Heated CO <sub>2</sub> at<br>1000 °C | -0.010 | -5.898  | -6.628  | -13.528 | 5.466 | -0.824 | -1.789 | 17.231 | 0.003 | 1.139 | 0.915 |
| 48392 | 150811-33-R | Heated CO <sub>2</sub> at<br>1000 °C | 17.963 | -5.644  | 12.107  | -13.075 | 4.802 | -0.766 | -1.839 | -3.052 | 0.003 | 1.139 | 0.915 |
| 48511 | 150814-14-R | Heated CO <sub>2</sub> at<br>1000 °C | 17.652 | -14.474 | 2.941   | -33.061 | 5.999 | -0.776 | -4.450 | 16.122 | 0.003 | 1.139 | 0.915 |
| 48521 | 150815-31-R | Heated CO <sub>2</sub> at<br>1000 °C | 17.630 | -14.258 | 3.141   | -32.340 | 4.686 | -0.770 | -4.143 | 14.382 | 0.003 | 1.139 | 0.915 |
| 48531 | 150815-33-R | Heated CO <sub>2</sub> at<br>1000 °C | 17.893 | -5.435  | 12.255  | -12.499 | 4.233 | -0.756 | -1.675 | -3.955 | 0.003 | 1.139 | 0.915 |
| 48639 | 150819-11-R | Heated CO <sub>2</sub> at<br>1000 °C | 17.192 | -27.313 | -10.420 | -62.045 | 5.985 | -0.825 | -8.630 | 43.142 | 0.003 | 1.139 | 0.915 |

|       |             |                                      |        |         |         |         |        |        |        |         |       |       |       |       |       |       |       |
|-------|-------------|--------------------------------------|--------|---------|---------|---------|--------|--------|--------|---------|-------|-------|-------|-------|-------|-------|-------|
| 48649 | 150819-14-R | Heated CO <sub>2</sub> at<br>1000 °C | 17.557 | -14.955 | 2.389   | -33.823 | 4.975  | -0.751 | -4.262 | 16.163  | 0.003 | 1.139 | 0.915 |       |       |       |       |
| 48778 | 150824-11-R | Heated CO <sub>2</sub> at<br>1000 °C | 17.127 | -28.593 | -11.775 | -64.549 | 5.359  | -0.833 | -8.669 | 45.268  | 0.003 | 1.139 | 0.915 |       |       |       |       |
| 48788 | 150824-14-R | Heated CO <sub>2</sub> at<br>1000 °C | 29.620 | -15.014 | 14.614  | -34.632 | 4.678  | -0.719 | -4.977 | 3.321   | 0.003 | 1.139 | 0.915 |       |       |       |       |
| 48798 | 150824-13-R | Heated CO <sub>2</sub> at<br>1000 °C | 29.318 | -13.848 | 15.469  | -31.373 | 3.956  | -0.738 | -3.978 | 0.583   | 0.003 | 1.139 | 0.915 |       |       |       |       |
| 48811 | 150824-31-R | Heated CO <sub>2</sub> at<br>1000 °C | 17.513 | -14.544 | 2.744   | -33.414 | 5.116  | -0.763 | -4.672 | 15.518  | 0.003 | 1.139 | 0.915 |       |       |       |       |
| 48821 | 150824-34-R | Heated CO <sub>2</sub> at<br>1000 °C | 18.220 | -0.920  | 17.132  | -2.285  | 4.274  | -0.735 | -0.447 | -13.081 | 0.003 | 1.139 | 0.915 |       |       |       |       |
| 48975 | 150830-11-R | Heated CO <sub>2</sub> at<br>1000 °C | -1.266 | -27.908 | -29.547 | -63.490 | 6.840  | -0.857 | -8.946 | 65.864  | 0.003 | 1.139 | 0.915 |       |       |       |       |
| 48985 | 150830-12-R | Heated CO <sub>2</sub> at<br>1000 °C | -1.012 | -25.936 | -27.376 | -59.009 | 7.121  | -0.877 | -8.231 | 61.636  | 0.003 | 1.139 | 0.915 |       |       |       |       |
| 49065 | 150910-31   | NBS-19                               | 30.438 | 2.807   | 33.831  | 6.633   | 2.743  | -0.412 | 1.005  | -34.114 | 0.003 | 1.139 | 0.915 | 0.407 | 0.394 | 0.378 | 0.391 |
| 49085 | 150910-32   | NBS-19                               | 30.512 | 3.010   | 34.131  | 7.155   | 2.835  | -0.394 | 1.120  | -34.483 | 0.003 | 1.139 | 0.915 | 0.426 |       |       | 0.410 |
| 49318 | 150925-31   | NBS-19                               | 30.565 | 3.058   | 34.224  | 7.661   | -2.765 | -0.405 | 1.525  | -40.018 | 0.003 | 1.139 | 0.915 | 0.413 |       |       | 0.397 |
| 49328 | 150925-32   | NBS-19                               | 30.669 | 3.370   | 34.612  | 8.372   | 0.658  | -0.440 | 1.609  | -37.415 | 0.003 | 1.139 | 0.915 | 0.372 |       |       | 0.356 |
| 49850 | 151011-31   | NBS-19                               | 30.640 | 3.292   | 34.480  | 7.557   | 4.452  | -0.461 | 0.957  | -33.588 | 0.003 | 1.139 | 0.915 | 0.348 |       |       | 0.332 |
| 49985 | 151014-31   | NBS-19                               | 30.635 | 3.394   | 34.588  | 7.622   | 4.111  | -0.453 | 0.817  | -34.106 | 0.003 | 1.139 | 0.915 | 0.357 |       |       | 0.341 |
| 50003 | 151014-32   | NBS-19                               | 30.491 | 2.953   | 34.064  | 6.700   | 3.172  | -0.382 | 0.782  | -34.030 | 0.003 | 1.139 | 0.915 | 0.439 |       |       | 0.423 |
| 50013 | 151014-33   | NBS-19                               | 30.515 | 2.978   | 34.076  | 6.748   | 3.829  | -0.419 | 0.777  | -33.469 | 0.003 | 1.139 | 0.915 | 0.397 |       |       | 0.381 |
| 50023 | 151014-34   | NBS-19                               | 30.703 | 3.514   | 34.814  | 10.120  | 2.045  | -0.419 | 3.058  | -36.387 | 0.003 | 1.139 | 0.915 | 0.395 |       |       | 0.378 |



| 49075             | 150910-33   | NBS-19                                   | 30.562                                                 | 3.338                                                  | 34.477                                                 | 7.738                                                  | 3.263                                                  | -0.432                                                    | 1.044                                                     | -34.743                                                   | 0.003                                   | 1.139                                  | 0.915                                      | 0.381                                                 |                                                | 0.364                                                          |                                                                                              |
|-------------------|-------------|------------------------------------------|--------------------------------------------------------|--------------------------------------------------------|--------------------------------------------------------|--------------------------------------------------------|--------------------------------------------------------|-----------------------------------------------------------|-----------------------------------------------------------|-----------------------------------------------------------|-----------------------------------------|----------------------------------------|--------------------------------------------|-------------------------------------------------------|------------------------------------------------|----------------------------------------------------------------|----------------------------------------------------------------------------------------------|
| 49095             | 150910-34   | NBS-19                                   | 30.551                                                 | 3.265                                                  | 34.410                                                 | 7.555                                                  | 3.667                                                  | -0.414                                                    | 1.007                                                     | -34.205                                                   | 0.003                                   | 1.139                                  | 0.915                                      | 0.402                                                 |                                                | 0.386                                                          |                                                                                              |
| <b>Analysis-#</b> | <b>Date</b> | <b>Sample ID</b>                         | <b>raw <math>\delta_{45}</math> (‰ WG<sup>a</sup>)</b> | <b>raw <math>\delta_{46}</math> (‰ WG<sup>a</sup>)</b> | <b>raw <math>\delta_{47}</math> (‰ WG<sup>a</sup>)</b> | <b>raw <math>\delta_{48}</math> (‰ WG<sup>a</sup>)</b> | <b>raw <math>\delta_{49}</math> (‰ WG<sup>a</sup>)</b> | <b>Brand raw <math>\Delta_{47}</math> (‰)<sup>b</sup></b> | <b>Brand raw <math>\Delta_{48}</math> (‰)<sup>b</sup></b> | <b>Brand raw <math>\Delta_{49}</math> (‰)<sup>b</sup></b> | <b>Slope<sub>REGI</sub><sup>c</sup></b> | <b>Slope<sub>ERR</sub><sup>d</sup></b> | <b>Intercept<sub>ERR</sub><sup>d</sup></b> | <b><math>\Delta_{47/ARF25}</math> (‰)<sup>e</sup></b> | <b>Mean <math>\Delta_{47/ARF25}</math> (‰)</b> | <b>Expected <math>\Delta_{47/ARF25}</math> (‰)<sup>f</sup></b> | <b><math>\Delta_{47}</math><br/>(STF-<math>\Delta_{47/ARF25}</math>)<br/>(‰)<sup>g</sup></b> |
| 56662             | 160415-32   | Equilibrated CO <sub>2</sub><br>at 50 °C | -0.755                                                 | -22.415                                                | -22.913                                                | -50.110                                                | 6.387                                                  | -0.113                                                    | -6.050                                                    | 53.079                                                    | 0.001                                   | 1.124                                  | 0.908                                      |                                                       |                                                |                                                                |                                                                                              |
| 56682             | 160415-34   | Equilibrated CO <sub>2</sub><br>at 50 °C | 17.839                                                 | -5.662                                                 | 12.651                                                 | -12.965                                                | 8.223                                                  | -0.086                                                    | -1.691                                                    | 0.508                                                     | 0.001                                   | 1.124                                  | 0.908                                      |                                                       |                                                |                                                                |                                                                                              |
| 56891             | 160415-31   | Equilibrated CO <sub>2</sub><br>at 50 °C | -1.153                                                 | -26.983                                                | -27.821                                                | -61.244                                                | 12.546                                                 | -0.132                                                    | -8.456                                                    | 69.775                                                    | 0.001                                   | 1.124                                  | 0.908                                      |                                                       |                                                |                                                                |                                                                                              |
| 56948             | 160415-32   | Equilibrated CO <sub>2</sub><br>at 50 °C | 28.457                                                 | -22.071                                                | 6.928                                                  | -50.693                                                | 8.109                                                  | -0.084                                                    | -7.359                                                    | 22.312                                                    | 0.001                                   | 1.124                                  | 0.908                                      |                                                       |                                                |                                                                |                                                                                              |
| 56968             | 160421-34   | Equilibrated CO <sub>2</sub><br>at 50 °C | 29.184                                                 | -7.257                                                 | 22.707                                                 | -16.490                                                | -5.606                                                 | -0.053                                                    | -2.058                                                    | -21.705                                                   | 0.001                                   | 1.124                                  | 0.908                                      |                                                       |                                                |                                                                |                                                                                              |
| 56978             | 160415-32   | Heated CO <sub>2</sub> at<br>1000 °C     | -0.775                                                 | -22.555                                                | -23.751                                                | -52.095                                                | 9.928                                                  | -0.809                                                    | -7.843                                                    | 57.104                                                    | 0.001                                   | 1.124                                  | 0.908                                      |                                                       |                                                |                                                                |                                                                                              |
| 56988             | 160415-24   | Heated CO <sub>2</sub> at<br>1000 °C     | 30.119                                                 | -0.040                                                 | 30.275                                                 | -0.671                                                 | 5.729                                                  | -0.741                                                    | -0.590                                                    | -25.487                                                   | 0.001                                   | 1.124                                  | 0.908                                      |                                                       |                                                |                                                                |                                                                                              |
| 56998             | 160422-26   | Heated CO <sub>2</sub> at<br>1000 °C     | 18.040                                                 | -4.947                                                 | 12.848                                                 | -12.002                                                | 9.043                                                  | -0.801                                                    | -2.153                                                    | -0.302                                                    | 0.001                                   | 1.124                                  | 0.908                                      |                                                       |                                                |                                                                |                                                                                              |
| 57008             | 160415-31   | Heated CO <sub>2</sub> at<br>1000 °C     | -1.009                                                 | -26.204                                                | -27.581                                                | -60.311                                                | 11.231                                                 | -0.821                                                    | -9.058                                                    | 66.543                                                    | 0.001                                   | 1.124                                  | 0.908                                      |                                                       |                                                |                                                                |                                                                                              |

|       |            |                                      |        |         |        |         |        |        |        |         |       |       |       |       |       |       |       |
|-------|------------|--------------------------------------|--------|---------|--------|---------|--------|--------|--------|---------|-------|-------|-------|-------|-------|-------|-------|
| 57088 | 160421-32  | Heated CO <sub>2</sub> at<br>1000 °C | 28.408 | -22.154 | 6.101  | -51.661 | 8.692  | -0.774 | -8.204 | 23.125  | 0.001 | 1.124 | 0.908 |       |       |       |       |
| 57098 | 160421-34  | Heated CO <sub>2</sub> at<br>1000 °C | 29.040 | -8.815  | 20.286 | -20.948 | 7.114  | -0.735 | -3.456 | -5.980  | 0.001 | 1.124 | 0.908 |       |       |       |       |
| 57166 | 160503-31  | ISTB-1                               | 18.140 | -3.109  | 15.326 | -7.561  | 6.323  | -0.275 | -1.361 | -6.712  | 0.001 | 1.124 | 0.908 | 0.659 | 0.713 | 0.726 | 0.667 |
| 57392 | 160506-16  | ISTB-1                               | 18.164 | -3.088  | 15.412 | -7.534  | 5.816  | -0.234 | -1.375 | -7.277  | 0.001 | 1.124 | 0.908 | 0.704 |       |       | 0.716 |
| 57607 | 160509-46  | ISTB-1                               | 18.144 | -3.044  | 15.438 | -7.558  | 5.871  | -0.232 | -1.487 | -7.288  | 0.001 | 1.124 | 0.908 | 0.706 |       |       | 0.719 |
| 58028 | 160514-02  | ISTB-1                               | 17.976 | -3.663  | 14.642 | -8.966  | 2.920  | -0.236 | -1.666 | -8.819  | 0.001 | 1.124 | 0.908 | 0.703 |       |       | 0.715 |
| 58038 | 160515-A1  | ISTB-1                               | 17.977 | -3.733  | 14.571 | -9.313  | 4.468  | -0.238 | -1.875 | -7.153  | 0.001 | 1.124 | 0.908 | 0.701 |       |       | 0.713 |
| 58133 | 160516-B1  | ISTB-1                               | 18.244 | -3.173  | 15.418 | -7.796  | 3.970  | -0.225 | -1.469 | -9.016  | 0.001 | 1.124 | 0.908 | 0.714 |       |       | 0.727 |
| 58527 | 160520-B1  | ISTB-1                               | 18.081 | -3.410  | 15.012 | -8.220  | 3.219  | -0.228 | -1.422 | -9.127  | 0.001 | 1.124 | 0.908 | 0.712 |       |       | 0.724 |
| 58918 | 160522-B1  | ISTB-1                               | 18.117 | -3.520  | 14.923 | -8.545  | 4.141  | -0.243 | -1.528 | -8.039  | 0.001 | 1.124 | 0.908 | 0.695 |       |       | 0.706 |
| 59022 | 160522-B3  | ISTB-1                               | 18.135 | -3.282  | 15.193 | -7.712  | 0.957  | -0.230 | -1.167 | -11.667 | 0.001 | 1.124 | 0.908 | 0.709 |       |       | 0.721 |
| 59197 | 160522-B4  | ISTB-1                               | 17.975 | -3.914  | 14.390 | -9.601  | 4.074  | -0.235 | -1.801 | -7.184  | 0.001 | 1.124 | 0.908 | 0.705 |       |       | 0.717 |
| 59553 | 160605-B8  | ISTB-1                               | 18.054 | -3.599  | 14.830 | -8.900  | 4.699  | -0.192 | -1.727 | -7.265  | 0.001 | 1.124 | 0.908 | 0.753 |       |       | 0.769 |
| 59603 | 160606-B1  | ISTB-1                               | 18.199 | -3.248  | 15.306 | -8.006  | 2.588  | -0.217 | -1.530 | -10.188 | 0.001 | 1.124 | 0.908 | 0.724 |       |       | 0.737 |
| 59749 | 160608-E8  | ISTB-1                               | 18.010 | -3.732  | 14.586 | -9.147  | 4.318  | -0.256 | -1.709 | -7.337  | 0.001 | 1.124 | 0.908 | 0.681 |       |       | 0.690 |
| 59944 | 160610-E10 | ISTB-1                               | 16.092 | -8.306  | 8.171  | -18.621 | -3.059 | -0.130 | -2.113 | -3.677  | 0.001 | 1.124 | 0.908 | 0.831 |       |       | 0.855 |
| 59964 | 160611-F6  | ISTB-1                               | 18.277 | -3.423  | 15.197 | -8.300  | 4.650  | -0.230 | -1.476 | -7.890  | 0.001 | 1.124 | 0.908 | 0.709 |       |       | 0.721 |
| 60158 | 160614-B3  | ISTB-1                               | 18.133 | -3.359  | 15.070 | -8.220  | 4.176  | -0.273 | -1.523 | -8.334  | 0.001 | 1.124 | 0.908 | 0.661 |       |       | 0.669 |
| 56724 | 160415-23  | ISTB-1                               | 18.104 | -2.987  | 15.491 | -7.150  | 8.296  | -0.196 | -1.192 | -4.966  | 0.001 | 1.124 | 0.908 | 0.746 |       |       | 0.762 |
| 56734 | 160415-24  | ISTB-1                               | 18.136 | -3.025  | 15.462 | -7.321  | 11.423 | -0.220 | -1.288 | -1.839  | 0.001 | 1.124 | 0.908 | 0.720 |       |       | 0.734 |
| 56881 | 160422-26  | NBS-19                               | 30.264 | 3.060   | 33.830 | 6.512   | 5.677  | -0.487 | 0.381  | -31.594 | 0.001 | 1.124 | 0.908 | 0.394 | 0.394 | 0.378 | 0.378 |
| 57243 | 160503-36  | NBS-19                               | 30.040 | 2.579   | 33.129 | 5.668   | 5.906  | -0.469 | 0.500  | -30.237 | 0.001 | 1.124 | 0.908 | 0.414 |       |       | 0.400 |
| 57303 | 160504-26  | NBS-19                               | 30.413 | 3.293   | 34.221 | 7.239   | 5.060  | -0.486 | 0.639  | -32.779 | 0.001 | 1.124 | 0.908 | 0.394 |       |       | 0.378 |

|       |           |        |        |       |        |       |       |        |       |         |       |       |       |       |       |
|-------|-----------|--------|--------|-------|--------|-------|-------|--------|-------|---------|-------|-------|-------|-------|-------|
| 57527 | 160507-46 | NBS-19 | 30.156 | 2.773 | 33.411 | 6.121 | 5.112 | -0.502 | 0.565 | -31.486 | 0.001 | 1.124 | 0.908 | 0.376 | 0.359 |
| 57887 | 160512-46 | NBS-19 | 30.284 | 3.039 | 33.823 | 6.781 | 4.370 | -0.492 | 0.691 | -32.831 | 0.001 | 1.124 | 0.908 | 0.387 | 0.371 |
| 58048 | 160515-A3 | NBS-19 | 30.170 | 2.597 | 33.244 | 5.559 | 4.756 | -0.505 | 0.357 | -31.508 | 0.001 | 1.124 | 0.908 | 0.374 | 0.356 |
| 58262 | 160514-16 | NBS-19 | 30.410 | 3.212 | 34.182 | 7.246 | 2.706 | -0.442 | 0.806 | -34.889 | 0.001 | 1.124 | 0.908 | 0.443 | 0.432 |
| 58331 | 160516-A1 | NBS-19 | 30.130 | 2.706 | 33.344 | 6.277 | 2.054 | -0.476 | 0.853 | -34.280 | 0.001 | 1.124 | 0.908 | 0.406 | 0.392 |
| 58419 | 160520-A2 | NBS-19 | 30.275 | 2.705 | 33.470 | 6.239 | 3.453 | -0.498 | 0.818 | -33.075 | 0.001 | 1.124 | 0.908 | 0.381 | 0.365 |
| 58606 | 160522-A1 | NBS-19 | 30.363 | 2.956 | 33.844 | 6.850 | 4.275 | -0.470 | 0.924 | -32.846 | 0.001 | 1.124 | 0.908 | 0.413 | 0.398 |
| 58948 | 160522-A3 | NBS-19 | 30.264 | 2.813 | 33.532 | 6.500 | 3.006 | -0.534 | 0.861 | -33.699 | 0.001 | 1.124 | 0.908 | 0.341 | 0.321 |
| 59110 | 160522-A4 | NBS-19 | 30.291 | 2.802 | 33.590 | 6.359 | 3.792 | -0.492 | 0.743 | -32.947 | 0.001 | 1.124 | 0.908 | 0.388 | 0.371 |
| 59419 | 160603-A7 | NBS-19 | 30.345 | 2.936 | 33.799 | 6.777 | 4.208 | -0.475 | 0.892 | -32.854 | 0.001 | 1.124 | 0.908 | 0.406 | 0.392 |
| 59613 | 160606-A1 | NBS-19 | 30.437 | 3.121 | 34.101 | 7.242 | 0.891 | -0.457 | 0.984 | -36.490 | 0.001 | 1.124 | 0.908 | 0.426 | 0.413 |
| 59663 | 160607-C9 | NBS-19 | 30.304 | 2.821 | 33.618 | 6.435 | 3.376 | -0.498 | 0.780 | -33.397 | 0.001 | 1.124 | 0.908 | 0.382 | 0.365 |
| 59829 | 160609-E7 | NBS-19 | 30.364 | 2.940 | 33.836 | 6.752 | 3.270 | -0.463 | 0.858 | -33.785 | 0.001 | 1.124 | 0.908 | 0.420 | 0.406 |
| 59879 | 160610-E9 | NBS-19 | 30.292 | 2.824 | 33.630 | 6.675 | 3.434 | -0.477 | 1.013 | -33.335 | 0.001 | 1.124 | 0.908 | 0.405 | 0.390 |
| 60024 | 160612-F5 | NBS-19 | 30.278 | 2.691 | 33.419 | 6.303 | 3.318 | -0.536 | 0.910 | -33.180 | 0.001 | 1.124 | 0.908 | 0.339 | 0.318 |
| 60044 | 160612-F7 | NBS-19 | 30.152 | 2.303 | 32.915 | 5.282 | 5.098 | -0.517 | 0.669 | -30.601 | 0.001 | 1.124 | 0.908 | 0.361 | 0.342 |
| 60088 | 160613-A1 | NBS-19 | 30.367 | 2.949 | 33.835 | 6.897 | 3.716 | -0.476 | 0.984 | -33.375 | 0.001 | 1.124 | 0.908 | 0.405 | 0.391 |
| 56744 | 160415-25 | NBS-19 | 30.336 | 3.282 | 34.158 | 6.849 | 8.757 | -0.459 | 0.273 | -29.122 | 0.001 | 1.124 | 0.908 | 0.424 | 0.411 |
| 56754 | 160415-26 | NBS-19 | 30.217 | 3.075 | 33.788 | 6.510 | 9.707 | -0.495 | 0.348 | -27.695 | 0.001 | 1.124 | 0.908 | 0.384 | 0.368 |

<sup>a</sup> WG: working gas. These are raw values relative to a reference gas with  $\delta^{13}\text{C} = -29.85\text{‰}$  (VPDB) and  $\delta^{18}\text{O} = -5.31\text{‰}$  (VPDB).

<sup>b</sup> The Brand raw  $\Delta_{47}$ , raw  $\Delta_{48}$  and raw  $\Delta_{49}$  values were calculated by converting our measured raw  $\delta_{45}$ , raw  $\delta_{46}$ , raw  $\delta_{47}$ , raw  $\delta_{48}$  and raw  $\delta_{49}$  values within the Brand parameter frame (14-15).

<sup>c</sup> Slope<sub>EGL</sub>: the slope of Equilibrated Gas Line (EGL) of our laboratory following the method of ref. 12.

<sup>d</sup> Slope<sub>ETF</sub> and Intercept<sub>ETF</sub>: the slope and intercept of Empirical Transfer Function (ETF) of our laboratory following the method of ref. 12.

<sup>e</sup>  $\Delta_{47\text{ARF}25}$  was calculated from Brand raw  $\Delta_{47}$  value by applying it to the Absolute Reference Frame (ARF, which includes the values of  $\text{Slope}_{\text{EGL}}$ ,  $\text{Slope}_{\text{ETF}}$  and  $\text{Intercept}_{\text{ETF}}$ ) of our laboratory following the method of [ref. 12](#) and then scaling to a 25 °C phosphoric acid reaction by addition of a 0.082‰ temperature correction factor for 90 °C reactions ([ref. 13](#)).

<sup>f</sup> The expected  $\Delta_{47\text{ARF}25}$  value was the long-term observed value or the reported value based on the four ETH standards (ETH-1: 0.258 ‰, ETH-2: 0.256 ‰, EHT-3: 0.693 ‰ and ETH-4: 0.507 ‰) in [ref. 17](#). In this study, two standards were used, one is international standard (NBS-19) and another is in-house standard (ISTB-1), and their expected values are 0.378 ‰ and 0.726 ‰, respectively.

<sup>g</sup> The  $\text{STF}-\Delta_{47\text{ARF}25}$  value was calibrated by applying the Standards Transfer Function (STF) to its average  $\Delta_{47\text{ARF}25}$  value. The STF was built by comparing the observed average  $\Delta_{47\text{ARF}25}$  values to their expected  $\Delta_{47\text{ARF}25}$  values. In order to simplify the description, here we use  $\Delta_{47}$  to replace the  $\text{STF}-\Delta_{47\text{ARF}25}$  and also in the paper.



**Table S4. The total organic carbon (TOC), major and trace elements data of whole rocks from the Doushantuo Formation, and rare earth elements + Yttrium (REE+Y) concentration data of the whole rock and the carbonate fraction.**

| Height in<br>ZK312-P312 (m) | Sample ID | TOC<br>(%) <sup>a</sup> | Major   |     | Trace   |      | REE+Y of the whole rock |      |      |      |      |      |      |      |       |      |      |      |      |      |
|-----------------------------|-----------|-------------------------|---------|-----|---------|------|-------------------------|------|------|------|------|------|------|------|-------|------|------|------|------|------|
|                             |           |                         | element |     | element |      | (ppm)                   |      |      |      |      |      |      |      |       |      |      |      |      |      |
|                             |           |                         | Mn      | Sr  | Th      | La   | Ce                      | Pr   | Nd   | Sm   | Eu   | Gd   | Tb   | Dy   | Y     | Ho   | Er   | Tm   | Yb   | Lu   |
| 137.3                       | ZK312-275 | 0.36                    | 39      | 49  | 0.16    | 1.31 | 2.00                    | 0.32 | 1.37 | 0.26 | 0.07 | 0.30 | 0.05 | 0.27 | 2.29  | 0.05 | 0.17 | 0.02 | 0.13 | 0.02 |
| 133.8                       | ZK312-279 | 0.28                    | 34      | 75  | 0.19    | 2.45 | 3.30                    | 0.50 | 2.36 | 0.51 | 0.10 | 0.52 | 0.07 | 0.42 | 4.00  | 0.09 | 0.30 | 0.03 | 0.22 | 0.03 |
| 131.5                       | ZK312-282 |                         | 87      | 121 | 0.36    | 3.04 | 4.98                    | 0.81 | 3.42 | 0.70 | 0.17 | 0.72 | 0.10 | 0.60 | 5.04  | 0.12 | 0.33 | 0.05 | 0.26 | 0.04 |
| 128.1                       | ZK312-286 | 0.37                    | 46      | 82  | 0.18    | 2.25 | 2.71                    | 0.50 | 2.20 | 0.39 | 0.09 | 0.34 | 0.05 | 0.32 | 2.84  | 0.06 | 0.19 | 0.03 | 0.17 | 0.02 |
| 126.1                       | ZK312-288 | 0.55                    | 57      | 85  | 0.56    | 2.85 | 4.28                    | 0.64 | 2.71 | 0.56 | 0.13 | 0.52 | 0.07 | 0.45 | 3.60  | 0.10 | 0.30 | 0.04 | 0.27 | 0.03 |
| 122.1                       | ZK312-293 | 0.04                    | 56      | 47  | 0.17    | 1.80 | 3.16                    | 0.48 | 2.04 | 0.40 | 0.10 | 0.43 | 0.06 | 0.36 | 2.95  | 0.07 | 0.19 | 0.03 | 0.15 | 0.02 |
| 119.6                       | ZK312-296 |                         | 70      | 90  | 0.30    | 2.32 | 4.46                    | 0.63 | 2.59 | 0.60 | 0.12 | 0.54 | 0.09 | 0.52 | 3.84  | 0.11 | 0.31 | 0.05 | 0.31 | 0.05 |
| 116.9                       | ZK312-299 | 0.13                    | 62      | 92  | 0.46    | 3.96 | 6.84                    | 1.00 | 4.22 | 0.85 | 0.19 | 0.95 | 0.13 | 0.77 | 6.22  | 0.14 | 0.40 | 0.07 | 0.36 | 0.04 |
| 116.0                       | ZK312-300 | 0.11                    | 40      | 56  | 0.51    | 3.27 | 5.67                    | 0.86 | 3.91 | 0.83 | 0.20 | 0.79 | 0.13 | 0.79 | 6.48  | 0.15 | 0.45 | 0.07 | 0.37 | 0.05 |
| 113.0                       | ZK312-304 | 1.02                    | 51      | 101 | 1.32    | 8.71 | 14.10                   | 2.02 | 8.86 | 1.87 | 0.40 | 1.93 | 0.28 | 1.76 | 14.75 | 0.34 | 0.99 | 0.14 | 0.90 | 0.12 |
| 110.9                       | ZK312-307 | 0.69                    | 24      | 93  | 0.53    | 5.58 | 7.60                    | 1.09 | 4.66 | 0.87 | 0.19 | 0.96 | 0.15 | 0.91 | 9.51  | 0.19 | 0.59 | 0.08 | 0.45 | 0.05 |
| 108.3                       | ZK312-310 |                         | 24      | 93  | 0.11    | 2.64 | 4.27                    | 0.67 | 3.01 | 0.67 | 0.15 | 0.73 | 0.12 | 0.71 | 7.31  | 0.16 | 0.39 | 0.06 | 0.24 | 0.04 |
| 104.0                       | ZK312-313 | 0.11                    | 48      | 54  | 0.33    | 2.11 | 2.98                    | 0.50 | 2.20 | 0.44 | 0.08 | 0.43 | 0.06 | 0.37 | 2.99  | 0.08 | 0.23 | 0.03 | 0.20 | 0.03 |
| 100.8                       | ZK312-317 | 0.02                    | 68      | 38  | 0.12    | 1.71 | 2.65                    | 0.42 | 1.75 | 0.35 | 0.09 | 0.36 | 0.05 | 0.30 | 2.03  | 0.06 | 0.16 | 0.02 | 0.13 | 0.02 |
| 98.6                        | ZK312-321 | 0.03                    | 96      | 52  | 0.16    | 2.61 | 3.71                    | 0.70 | 3.11 | 0.59 | 0.13 | 0.60 | 0.08 | 0.45 | 3.15  | 0.08 | 0.21 | 0.03 | 0.15 | 0.02 |
| 95.1                        | ZK312-326 |                         | 81      | 48  | 0.14    | 1.88 | 2.48                    | 0.47 | 2.00 | 0.42 | 0.10 | 0.40 | 0.07 | 0.36 | 2.51  | 0.07 | 0.17 | 0.03 | 0.15 | 0.02 |
| 93.0                        | ZK312-328 |                         | 89      | 51  | 0.19    | 1.84 | 3.15                    | 0.53 | 2.17 | 0.45 | 0.12 | 0.47 | 0.08 | 0.46 | 3.17  | 0.08 | 0.24 | 0.03 | 0.17 | 0.02 |
| 91.2                        | ZK312-331 | 0.13                    | 79      | 59  | 0.13    | 1.04 | 1.72                    | 0.30 | 1.41 | 0.37 | 0.07 | 0.39 | 0.06 | 0.34 | 2.72  | 0.07 | 0.20 | 0.02 | 0.14 | 0.02 |

|      |           |      |      |     |      |       |       |      |       |      |      |      |      |      |       |      |      |      |      |      |
|------|-----------|------|------|-----|------|-------|-------|------|-------|------|------|------|------|------|-------|------|------|------|------|------|
| 88.5 | ZK312-335 | 0.25 | 111  | 118 | 0.75 | 4.28  | 7.52  | 1.26 | 5.77  | 1.34 | 0.31 | 1.33 | 0.20 | 1.21 | 7.87  | 0.22 | 0.61 | 0.09 | 0.48 | 0.07 |
| 86.5 | ZK312-339 | 0.23 | 101  | 48  | 0.19 | 1.31  | 2.38  | 0.34 | 1.50  | 0.33 | 0.09 | 0.37 | 0.05 | 0.31 | 2.36  | 0.06 | 0.17 | 0.02 | 0.15 | 0.02 |
| 83.0 | ZK312-346 |      | 132  | 74  | 0.11 | 0.93  | 1.78  | 0.28 | 1.08  | 0.29 | 0.06 | 0.30 | 0.05 | 0.38 | 3.21  | 0.08 | 0.23 | 0.03 | 0.20 | 0.03 |
| 80.3 | ZK312-351 | 0.1  | 85   | 125 | 0.52 | 3.21  | 5.27  | 0.96 | 4.04  | 0.96 | 0.22 | 0.97 | 0.15 | 0.89 | 6.83  | 0.19 | 0.50 | 0.07 | 0.38 | 0.05 |
| 76.6 | ZK312-356 | 1.38 | 122  | 540 | 1.39 | 12.44 | 21.03 | 3.34 | 14.79 | 3.06 | 0.77 | 3.24 | 0.48 | 2.87 | 20.95 | 0.56 | 1.52 | 0.21 | 1.18 | 0.16 |
| 73.3 | ZK312-361 | 0.9  | 128  | 680 | 0.93 | 8.95  | 14.41 | 2.37 | 10.23 | 2.21 | 0.56 | 2.41 | 0.35 | 2.12 | 16.52 | 0.42 | 1.17 | 0.15 | 0.89 | 0.13 |
| 71.6 | ZK312-364 | 1.32 | 125  | 595 | 1.39 | 10.80 | 18.47 | 2.95 | 13.40 | 2.93 | 0.67 | 3.02 | 0.47 | 2.84 | 21.20 | 0.53 | 1.57 | 0.22 | 1.20 | 0.17 |
| 67.9 | ZK312-368 | 0.34 | 87   | 367 | 0.09 | 0.80  | 1.58  | 0.27 | 1.35  | 0.32 | 0.07 | 0.30 | 0.04 | 0.27 | 2.35  | 0.06 | 0.17 | 0.03 | 0.16 | 0.02 |
| 64.0 | ZK312-376 | 0.3  | 51   | 381 | 0.13 | 1.05  | 1.85  | 0.34 | 1.52  | 0.37 | 0.07 | 0.35 | 0.05 | 0.30 | 2.48  | 0.06 | 0.18 | 0.03 | 0.15 | 0.02 |
| 59.0 | ZK312-384 | 1.7  | 108  | 256 | 0.43 | 6.22  | 10.45 | 1.85 | 8.84  | 1.99 | 0.47 | 2.05 | 0.30 | 1.82 | 16.88 | 0.38 | 1.05 | 0.15 | 0.74 | 0.09 |
| 53.0 | P312-8    | 0.13 | 229  | 50  | 2.00 | 4.56  | 8.68  | 1.46 | 6.47  | 1.55 | 0.30 | 1.38 | 0.25 | 1.59 | 10.14 | 0.34 | 1.01 | 0.16 | 1.00 | 0.15 |
| 50.0 | P312-14   |      | 311  | 143 | 0.03 | 0.71  | 0.98  | 0.18 | 0.90  | 0.20 | 0.05 | 0.20 | 0.03 | 0.22 | 1.80  | 0.04 | 0.13 | 0.02 | 0.09 | 0.01 |
| 47.0 | P312-20   | 0.02 | 419  | 109 | 0.14 | 1.55  | 2.95  | 0.42 | 2.05  | 0.50 | 0.11 | 0.56 | 0.08 | 0.52 | 4.26  | 0.10 | 0.27 | 0.04 | 0.22 | 0.03 |
| 44.0 | P312-26   |      | 228  | 367 | 0.56 | 20.70 | 24.02 | 5.55 | 25.92 | 6.28 | 1.40 | 6.98 | 1.01 | 6.13 | 53.81 | 1.19 | 3.15 | 0.40 | 1.90 | 0.25 |
| 40.0 | P312-32   | 0.12 | 383  | 91  | 0.21 | 4.95  | 7.00  | 1.45 | 7.29  | 1.74 | 0.41 | 2.15 | 0.31 | 1.90 | 15.85 | 0.39 | 1.00 | 0.14 | 0.70 | 0.10 |
| 38.5 | P312-37   |      | 290  | 126 | 0.84 | 15.16 | 17.82 | 4.60 | 22.15 | 5.08 | 1.11 | 5.33 | 0.74 | 4.29 | 31.62 | 0.82 | 2.05 | 0.24 | 1.30 | 0.17 |
| 32.1 | P312-46   |      | 840  | 59  | 0.07 | 0.36  | 4.27  | 0.07 | 0.29  | 0.05 | 0.02 | 0.07 | 0.01 | 0.05 | 0.46  | 0.01 | 0.04 | 0.01 | 0.04 | 0.01 |
| 28.0 | P312-53   |      | 676  | 40  | 0.13 | 0.45  | 3.29  | 0.15 | 0.61  | 0.15 | 0.03 | 0.14 | 0.02 | 0.13 | 0.76  | 0.03 | 0.08 | 0.01 | 0.08 | 0.01 |
| 27.0 | P312-55   |      | 609  | 31  | 0.11 | 0.45  | 0.86  | 0.15 | 0.72  | 0.17 | 0.03 | 0.15 | 0.02 | 0.12 | 0.87  | 0.02 | 0.08 | 0.01 | 0.05 | 0.01 |
| 25.0 | P312-60   | 0.01 | 614  | 36  | 0.12 | 0.39  | 0.72  | 0.13 | 0.56  | 0.12 | 0.02 | 0.09 | 0.01 | 0.11 | 0.64  | 0.02 | 0.05 | 0.01 | 0.05 | 0.01 |
| 22.0 | P312-66   |      | 320  | 43  | 0.10 | 0.33  | 0.48  | 0.08 | 0.33  | 0.08 | 0.02 | 0.06 | 0.01 | 0.07 | 0.41  | 0.02 | 0.05 | 0.01 | 0.05 | 0.01 |
| 21.0 | P312-68   | 0.02 | 265  | 51  | 0.55 | 0.88  | 1.94  | 0.32 | 1.42  | 0.35 | 0.05 | 0.35 | 0.05 | 0.32 | 1.86  | 0.05 | 0.21 | 0.03 | 0.15 | 0.03 |
| 20.0 | P312-70   |      | 335  | 51  | 0.14 | 0.50  | 0.92  | 0.13 | 0.49  | 0.13 | 0.02 | 0.09 | 0.02 | 0.12 | 0.58  | 0.02 | 0.06 | 0.01 | 0.06 | 0.01 |
| 2.5  | P312-105  | 0.02 | 1844 | 72  | 0.59 | 1.43  | 3.77  | 0.34 | 1.28  | 0.31 | 0.07 | 0.31 | 0.04 | 0.27 | 2.08  | 0.06 | 0.18 | 0.03 | 0.16 | 0.03 |
| 0.7  | P312-114  | 0.02 | 808  | 54  | 2.17 | 6.84  | 11.96 | 1.32 | 4.82  | 1.05 | 0.23 | 1.06 | 0.17 | 1.13 | 7.32  | 0.23 | 0.70 | 0.11 | 0.67 | 0.10 |

| Height in<br>ZK312-P312 (m) | Sample ID | Major element |     | Trace element |      | REE+Y of the carbonate fraction <sup>b</sup> |      |      |      |      |      |      |      |       |      |      |      |      |      |
|-----------------------------|-----------|---------------|-----|---------------|------|----------------------------------------------|------|------|------|------|------|------|------|-------|------|------|------|------|------|
|                             |           | (ppm)         |     | (ppm)         |      | (ppm)                                        |      |      |      |      |      |      |      |       |      |      |      |      |      |
|                             |           | Mn            | Sr  | Th            | La   | Ce                                           | Pr   | Nd   | Sm   | Eu   | Gd   | Tb   | Dy   | Y     | Ho   | Er   | Tm   | Yb   | Lu   |
| 137.3                       | ZK312-275 | 39            | 49  | 0.16          | 1.30 | 1.97                                         | 0.31 | 1.35 | 0.25 | 0.07 | 0.29 | 0.05 | 0.27 | 2.26  | 0.05 | 0.17 | 0.02 | 0.13 | 0.02 |
| 133.8                       | ZK312-279 | 34            | 75  | 0.19          | 2.42 | 3.26                                         | 0.50 | 2.33 | 0.50 | 0.10 | 0.52 | 0.07 | 0.41 | 3.95  | 0.08 | 0.29 | 0.03 | 0.22 | 0.03 |
| 131.5                       | ZK312-282 | 87            | 121 | 0.36          | 2.96 | 4.86                                         | 0.79 | 3.33 | 0.68 | 0.16 | 0.70 | 0.10 | 0.58 | 4.92  | 0.12 | 0.33 | 0.05 | 0.26 | 0.03 |
| 128.1                       | ZK312-286 | 46            | 82  | 0.18          | 2.22 | 2.67                                         | 0.49 | 2.17 | 0.38 | 0.08 | 0.34 | 0.05 | 0.31 | 2.81  | 0.06 | 0.19 | 0.03 | 0.16 | 0.02 |
| 126.1                       | ZK312-288 | 57            | 85  | 0.56          | 2.75 | 4.12                                         | 0.62 | 2.60 | 0.54 | 0.12 | 0.50 | 0.07 | 0.44 | 3.46  | 0.09 | 0.29 | 0.04 | 0.26 | 0.03 |
| 122.1                       | ZK312-293 | 56            | 47  | 0.17          | 1.78 | 3.12                                         | 0.48 | 2.01 | 0.40 | 0.10 | 0.42 | 0.06 | 0.36 | 2.92  | 0.07 | 0.19 | 0.03 | 0.15 | 0.02 |
| 119.6                       | ZK312-296 | 70            | 90  | 0.30          | 2.27 | 4.36                                         | 0.62 | 2.53 | 0.58 | 0.12 | 0.53 | 0.09 | 0.51 | 3.76  | 0.11 | 0.30 | 0.05 | 0.30 | 0.05 |
| 116.9                       | ZK312-299 | 62            | 92  | 0.46          | 3.84 | 6.63                                         | 0.97 | 4.09 | 0.82 | 0.19 | 0.92 | 0.13 | 0.74 | 6.02  | 0.14 | 0.39 | 0.06 | 0.35 | 0.04 |
| 116.0                       | ZK312-300 | 40            | 56  | 0.51          | 3.16 | 5.47                                         | 0.83 | 3.77 | 0.80 | 0.19 | 0.77 | 0.13 | 0.76 | 6.26  | 0.14 | 0.43 | 0.06 | 0.35 | 0.05 |
| 113.0                       | ZK312-304 | 51            | 101 | 1.32          | 7.92 | 12.82                                        | 1.84 | 8.06 | 1.70 | 0.36 | 1.76 | 0.25 | 1.60 | 13.41 | 0.31 | 0.90 | 0.13 | 0.82 | 0.11 |
| 110.9                       | ZK312-307 | 24            | 93  | 0.53          | 5.38 | 7.32                                         | 1.05 | 4.49 | 0.84 | 0.19 | 0.93 | 0.15 | 0.87 | 9.16  | 0.18 | 0.57 | 0.08 | 0.44 | 0.05 |
| 108.3                       | ZK312-310 | 24            | 93  | 0.11          | 2.62 | 4.24                                         | 0.67 | 2.99 | 0.66 | 0.15 | 0.73 | 0.12 | 0.70 | 7.25  | 0.16 | 0.39 | 0.06 | 0.24 | 0.04 |
| 104.0                       | ZK312-313 | 48            | 54  | 0.33          | 2.06 | 2.91                                         | 0.49 | 2.15 | 0.43 | 0.08 | 0.42 | 0.06 | 0.36 | 2.93  | 0.08 | 0.22 | 0.03 | 0.20 | 0.03 |
| 100.8                       | ZK312-317 | 68            | 38  | 0.12          | 1.70 | 2.63                                         | 0.42 | 1.74 | 0.35 | 0.09 | 0.36 | 0.05 | 0.30 | 2.01  | 0.06 | 0.16 | 0.02 | 0.13 | 0.02 |
| 98.6                        | ZK312-321 | 96            | 52  | 0.16          | 2.58 | 3.67                                         | 0.69 | 3.08 | 0.58 | 0.13 | 0.59 | 0.08 | 0.44 | 3.11  | 0.08 | 0.21 | 0.03 | 0.15 | 0.02 |
| 95.1                        | ZK312-326 | 81            | 48  | 0.14          | 1.86 | 2.46                                         | 0.46 | 1.98 | 0.42 | 0.09 | 0.40 | 0.06 | 0.36 | 2.48  | 0.07 | 0.17 | 0.03 | 0.15 | 0.02 |
| 93.0                        | ZK312-328 | 89            | 51  | 0.19          | 1.81 | 3.11                                         | 0.53 | 2.15 | 0.45 | 0.12 | 0.46 | 0.08 | 0.45 | 3.13  | 0.08 | 0.24 | 0.03 | 0.17 | 0.02 |
| 91.2                        | ZK312-331 | 79            | 59  | 0.13          | 1.03 | 1.71                                         | 0.30 | 1.40 | 0.36 | 0.07 | 0.39 | 0.06 | 0.33 | 2.70  | 0.07 | 0.20 | 0.02 | 0.14 | 0.02 |
| 88.5                        | ZK312-335 | 111           | 118 | 0.75          | 4.06 | 7.14                                         | 1.20 | 5.47 | 1.27 | 0.29 | 1.26 | 0.19 | 1.15 | 7.46  | 0.21 | 0.57 | 0.09 | 0.46 | 0.07 |
| 86.5                        | ZK312-339 | 101           | 48  | 0.19          | 1.29 | 2.34                                         | 0.33 | 1.48 | 0.33 | 0.09 | 0.36 | 0.05 | 0.31 | 2.33  | 0.06 | 0.17 | 0.02 | 0.15 | 0.02 |

|             |           |      |     |      |       |       |      |       |      |      |      |      |      |       |      |      |      |      |      |
|-------------|-----------|------|-----|------|-------|-------|------|-------|------|------|------|------|------|-------|------|------|------|------|------|
| <b>83.0</b> | ZK312-346 | 132  | 74  | 0.11 | 0.92  | 1.77  | 0.28 | 1.08  | 0.29 | 0.06 | 0.30 | 0.05 | 0.37 | 3.19  | 0.08 | 0.23 | 0.03 | 0.19 | 0.03 |
| <b>80.3</b> | ZK312-351 | 85   | 125 | 0.52 | 3.10  | 5.08  | 0.93 | 3.90  | 0.92 | 0.21 | 0.94 | 0.15 | 0.86 | 6.59  | 0.18 | 0.48 | 0.06 | 0.37 | 0.05 |
| <b>76.6</b> | ZK312-356 | 122  | 540 | 1.39 | 11.26 | 19.03 | 3.02 | 13.39 | 2.77 | 0.70 | 2.93 | 0.43 | 2.60 | 18.96 | 0.51 | 1.38 | 0.19 | 1.07 | 0.14 |
| <b>73.3</b> | ZK312-361 | 128  | 680 | 0.93 | 8.38  | 13.49 | 2.22 | 9.58  | 2.07 | 0.52 | 2.26 | 0.32 | 1.98 | 15.47 | 0.39 | 1.09 | 0.14 | 0.83 | 0.12 |
| <b>71.6</b> | ZK312-364 | 125  | 595 | 1.39 | 9.77  | 16.72 | 2.67 | 12.13 | 2.65 | 0.61 | 2.74 | 0.42 | 2.57 | 19.19 | 0.48 | 1.42 | 0.20 | 1.09 | 0.15 |
| <b>67.9</b> | ZK312-368 | 87   | 367 | 0.09 | 0.79  | 1.57  | 0.27 | 1.35  | 0.32 | 0.07 | 0.30 | 0.04 | 0.27 | 2.34  | 0.06 | 0.17 | 0.03 | 0.16 | 0.02 |
| <b>64.0</b> | ZK312-376 | 51   | 381 | 0.13 | 1.04  | 1.84  | 0.34 | 1.51  | 0.36 | 0.07 | 0.35 | 0.05 | 0.30 | 2.45  | 0.06 | 0.18 | 0.02 | 0.15 | 0.02 |
| <b>59.0</b> | ZK312-384 | 108  | 256 | 0.43 | 6.04  | 10.14 | 1.80 | 8.57  | 1.93 | 0.46 | 1.99 | 0.29 | 1.77 | 16.38 | 0.37 | 1.02 | 0.14 | 0.72 | 0.09 |
| <b>53.0</b> | P312-8    | 229  | 50  | 2.00 | 3.93  | 7.49  | 1.26 | 5.58  | 1.34 | 0.26 | 1.19 | 0.21 | 1.38 | 8.75  | 0.29 | 0.87 | 0.14 | 0.86 | 0.13 |
| <b>50.0</b> | P312-14   | 311  | 143 | 0.03 | 0.71  | 0.98  | 0.18 | 0.90  | 0.20 | 0.05 | 0.20 | 0.03 | 0.22 | 1.80  | 0.04 | 0.13 | 0.02 | 0.09 | 0.01 |
| <b>47.0</b> | P312-20   | 419  | 109 | 0.14 | 1.53  | 2.92  | 0.41 | 2.03  | 0.50 | 0.11 | 0.55 | 0.08 | 0.51 | 4.22  | 0.10 | 0.27 | 0.04 | 0.21 | 0.03 |
| <b>44.0</b> | P312-26   | 228  | 367 | 0.56 | 19.91 | 23.10 | 5.34 | 24.92 | 6.03 | 1.35 | 6.71 | 0.97 | 5.90 | 51.73 | 1.14 | 3.03 | 0.39 | 1.83 | 0.24 |
| <b>40.0</b> | P312-32   | 383  | 91  | 0.21 | 4.88  | 6.90  | 1.43 | 7.18  | 1.71 | 0.40 | 2.12 | 0.31 | 1.87 | 15.62 | 0.38 | 0.99 | 0.14 | 0.69 | 0.10 |
| <b>38.5</b> | P312-37   | 290  | 126 | 0.84 | 14.29 | 16.80 | 4.34 | 20.88 | 4.79 | 1.05 | 5.02 | 0.70 | 4.05 | 29.81 | 0.77 | 1.93 | 0.23 | 1.22 | 0.16 |
| <b>32.1</b> | P312-46   | 840  | 59  | 0.07 | 0.36  | 4.25  | 0.07 | 0.29  | 0.05 | 0.02 | 0.07 | 0.01 | 0.05 | 0.45  | 0.01 | 0.04 | 0.01 | 0.04 | 0.01 |
| <b>28.0</b> | P312-53   | 676  | 40  | 0.13 | 0.45  | 3.26  | 0.15 | 0.60  | 0.15 | 0.03 | 0.14 | 0.02 | 0.12 | 0.75  | 0.03 | 0.08 | 0.01 | 0.08 | 0.01 |
| <b>27.0</b> | P312-55   | 609  | 31  | 0.11 | 0.45  | 0.86  | 0.15 | 0.72  | 0.16 | 0.03 | 0.15 | 0.02 | 0.12 | 0.87  | 0.02 | 0.08 | 0.01 | 0.05 | 0.01 |
| <b>25.0</b> | P312-60   | 614  | 36  | 0.12 | 0.39  | 0.71  | 0.13 | 0.56  | 0.12 | 0.02 | 0.09 | 0.01 | 0.11 | 0.64  | 0.02 | 0.05 | 0.01 | 0.05 | 0.01 |
| <b>22.0</b> | P312-66   | 320  | 43  | 0.10 | 0.33  | 0.48  | 0.08 | 0.32  | 0.08 | 0.02 | 0.06 | 0.01 | 0.07 | 0.41  | 0.02 | 0.05 | 0.01 | 0.05 | 0.01 |
| <b>21.0</b> | P312-68   | 265  | 51  | 0.55 | 0.84  | 1.86  | 0.30 | 1.36  | 0.34 | 0.05 | 0.34 | 0.05 | 0.31 | 1.79  | 0.05 | 0.20 | 0.03 | 0.15 | 0.03 |
| <b>20.0</b> | P312-70   | 335  | 51  | 0.14 | 0.50  | 0.91  | 0.13 | 0.49  | 0.13 | 0.02 | 0.09 | 0.02 | 0.12 | 0.57  | 0.02 | 0.06 | 0.01 | 0.06 | 0.01 |
| <b>2.5</b>  | P312-105  | 1844 | 72  | 0.59 | 1.38  | 3.62  | 0.33 | 1.23  | 0.29 | 0.06 | 0.29 | 0.04 | 0.26 | 2.00  | 0.06 | 0.17 | 0.03 | 0.16 | 0.02 |
| <b>0.7</b>  | P312-114  | 808  | 54  | 2.17 | 5.83  | 10.18 | 1.12 | 4.10  | 0.89 | 0.20 | 0.91 | 0.15 | 0.97 | 6.23  | 0.19 | 0.60 | 0.09 | 0.57 | 0.08 |

<sup>a</sup> TOC data are from ref. 20. <sup>b</sup> REE concentration in carbonate fraction was calculated through the equation  $X_{\text{Sample}} \times (1 - \text{Th}_{\text{Sample}} / \text{Th}_{\text{PAAS}})$ , where X represents the concentration of interested element.

**Table S5. Geochemical and petrographic data for samples with different carbonate textures as observed in the sample slab and under microscopy.**

| Sample ID | Formation  | Carbonate texture           | Average $\Delta_{47}$ <sup>a</sup><br>(‰) | $\delta^{18}\text{O}$<br>(VPDB,‰) | Grain size<br>( $\mu\text{m}$ ) | 1 s.d. of grain size <sup>b</sup><br>( $\mu\text{m}$ ) | $T_{\Delta 47}$<br>(°C) | 1 s.e. of $T_{\Delta 47}$ <sup>c</sup><br>(°C) |
|-----------|------------|-----------------------------|-------------------------------------------|-----------------------------------|---------------------------------|--------------------------------------------------------|-------------------------|------------------------------------------------|
| ZK312-29  | Dengying   | Microcrystalline dolomite   | 0.512                                     | -4.86                             | 10                              | 4                                                      | 83                      | 7                                              |
| ZK312-29  | Dengying   | Carbonate vein              | 0.431                                     | -7.72                             | 61                              | 10                                                     | 137                     | 4                                              |
| ZK312-282 | Doushantuo | Microcrystalline dolomite   | 0.519                                     | -3.15                             | 17                              | 8                                                      | 80                      | 3                                              |
| ZK312-282 | Doushantuo | Carbonate vein              | 0.420                                     | -11.62                            | 182                             | 55                                                     | 146                     |                                                |
| ZK312-293 | Doushantuo | Microcrystalline dolomite   | 0.509                                     | -2.92                             | 11                              | 4                                                      | 85                      | 7                                              |
| ZK312-293 | Doushantuo | Coarse-crystalline dolomite | 0.488                                     | -3.93                             | 59                              | 36                                                     | 97                      | 14                                             |
| ZK312-307 | Doushantuo | Microcrystalline dolomite   | 0.531                                     | -2.37                             | 19                              | 6                                                      | 74                      | 3                                              |
| ZK312-307 | Doushantuo | Coarse-crystalline dolomite | 0.501                                     | -2.71                             | 68                              | 5                                                      | 90                      | 4                                              |
| ZK312-310 | Doushantuo | Microcrystalline dolomite   | 0.532                                     | -2.29                             | 22                              | 8                                                      | 73                      | 6                                              |
| ZK312-310 | Doushantuo | Coarse-crystalline dolomite | 0.528                                     | -2.84                             | 56                              | 20                                                     | 75                      | 4                                              |
| ZK312-317 | Doushantuo | Microcrystalline dolomite   | 0.546                                     | -4.31                             | 8                               | 3                                                      | 67                      | 12                                             |
| ZK312-317 | Doushantuo | Carbonate vein              | 0.520                                     | -8.20                             | 247                             | 15                                                     | 79                      | 11                                             |
| ZK312-326 | Doushantuo | Microcrystalline dolomite   | 0.560                                     | -2.19                             | 12                              | 5                                                      | 61                      | 2                                              |
| ZK312-326 | Doushantuo | Carbonate vein              | 0.484                                     | -9.42                             | 232                             | 15                                                     | 100                     |                                                |
| P312-20   | Doushantuo | Microcrystalline dolomite   | 0.513                                     | -4.33                             | 26                              | 8                                                      | 83                      | 3                                              |
| P312-20   | Doushantuo | Coarse-crystalline dolomite | 0.499                                     | -4.48                             | 26                              | 8                                                      | 91                      | 4                                              |
| P312-46   | Doushantuo | Microcrystalline dolomite   | 0.509                                     | -3.75                             | 20                              | 7                                                      | 85                      | 3                                              |
| P312-46   | Doushantuo | Coarse-crystalline dolomite | 0.526                                     | -5.38                             | 111                             | 28                                                     | 76                      | 4                                              |

<sup>a</sup>For simplification, we used  $\Delta_{47}$  to replace the  $\text{STF}-\Delta_{47\text{ARF25}}$  here (more details see Table S3).

<sup>b</sup>Standard deviation (s.d.) was derived from duplicate analyses.

<sup>c</sup>Standard error (s.e.) was given as  $1 \text{ s.d.}/(n^{0.5})$ .



## References

1. Zhang S, et al. (2015) New paleomagnetic results from the Ediacaran Doushantuo Formation in South China and their paleogeographic implications. *Precamb. Res.* 259:130–142.
2. Loyd SJ, et al. (2015) Evolution of Neoproterozoic Wonoka–Shuram Anomaly-aged carbonates: Evidence from clumped isotope paleothermometry. *Precamb. Res.* 264:179–191.
3. Bristow TF, Bonifacie M, Derkowski A., Eiler JM, Grotzinger JP (2011) A hydrothermal origin for isotopically anomalous cap dolostone cements from south China. *Nature* 474:68–71.
4. Zhang S, et al. (2013) Paleomagnetism of the late Cryogenian Nantuo Formation and paleogeographic implications for the South China Block. *J. Asian Earth Sci.* 72:164–177.
5. Jiang G, Shi X, Zhang S, Wang Y, Xiao S (2011) Stratigraphy and paleogeography of the Ediacaran Doushantuo Formation (ca. 635–551Ma) in South China. *Gondwana Res.* 19(4):831–849.
6. An Z, et al. (2015) Stratigraphic position of the Ediacaran Miaohu biota and its constraints on the age of the upper Doushantuo  $\delta^{13}\text{C}$  anomaly in the Yangtze Gorges area, South China. *Precamb. Res.* 271:243–253.
7. Henkes GA, et al. (2014) Temperature limits for preservation of primary calcite clumped isotope paleotemperatures. *Geochimica et Cosmochimica Acta* 139:362–382.
8. Lloyd MK, Ryb U, & Eiler JM (2018) Experimental calibration of clumped isotope reordering in dolomite. *Geochimica et Cosmochimica Acta* 242:1–20.
9. Passey BH & Henkes GA (2012) Carbonate clumped isotope bond reordering and geospeedometry. *Earth and Planetary Science Letters* 351–352:223–236.
10. Eiler JM (2011) Paleoclimate reconstruction using carbonate clumped isotope thermometry. *Quaternary Science Reviews* 30: 3575–3588.
11. Kouketsu Y, et al. (2014) A new approach to develop the Raman carbonaceous material geothermometer for low-grade metamorphism using peak width. *Island Arc* 23:33–50.
12. Dennis KJ, Affek HP, Passey BH, Schrag DP, Eiler JM (2011) Defining an absolute reference frame for ‘clumped’ isotope studies of  $\text{CO}_2$ . *Geochim. Cosmochim. Acta* 75:7117–7131.
13. Defliese WF, Hren MT, Lohmann KC (2015) Compositional and temperature effects of phosphoric acid fractionation on  $\Delta_{47}$  analysis and implications for discrepant calibrations. *Chem. Geol.* 396:51–60.
14. Daéron M, Blamart D, Peral M, Affek HP et al. (2016) Absolute isotopic abundance ratios and the accuracy of  $\Delta_{47}$  measurements. *Chem. Geol.* 441:83–96.
15. Brand WA, Assonov SS, Coplen TB (2010) Correction for the  $^{17}\text{O}$  interference in  $\delta^{13}\text{C}$  measurements when analyzing  $\text{CO}_2$  with stable isotope mass spectrometry (IUPAC Technical Report). *Pure Appl. Chem.* 82:1719–1733.
16. Müller IA, et al. (2019) Calibration of the oxygen and clumped isotope thermometers for (proto-)dolomite based on synthetic and natural carbonates. *Chemical Geology* 525:1–17.

17. Bernasconi SM, et al. (2018) Reducing uncertainties in carbonate clumped isotope analysis through consistent carbonate-based standardization. *Geochem. Geophys. Geosyst.* 19:2895–2914.
18. Bonifacie M, et al. (2017) Calibration of the dolomite clumped isotope thermometer from 25 to 350 °C, and implications for a universal calibration for all (Ca, Mg, Fe)CO<sub>3</sub> carbonates. *Geochim. Cosmochim. Acta* 200:255–279.
19. Petersen SV, et al. (2019) Effects of Improved <sup>17</sup>O Correction on Interlaboratory Agreement in Clumped Isotope Calibrations, Estimates of Mineral - Specific Offsets, and Temperature Dependence of Acid Digestion Fractionation. *Geochemistry, Geophysics, Geosystems* 20:1-25.
20. Li C, et al. (2017) Uncovering the spatial heterogeneity of Ediacaran carbon cycling. *Geobiology* 15:211-224.
